# Supplementary material for: Fine-tuning acetyl-CoA carboxylase 1 activity through localization: functional genomics reveals a role for the lysine acetyltransferase NuA4 and sphingolipid metabolism in regulating Acc1 activity and localization
Source: Genetics. 2022 May 24;221(4):iyac086. doi: 10.1093/genetics/iyac086 (PMC9339284; doi:10.1093/genetics/iyac086)
Supplement: iyac086_Table_S1 [file iyac086_table_s1.xlsx]

## Sheet: Sheet1
Process	Systematic name	Name
AMPK signaling	YDR216W	ADR1
AMPK signaling	YMR280C	CAT8
AMPK signaling	YER027C	GAL83
AMPK signaling	YGL035C	MIG1
AMPK signaling	YDR028C	REG1
AMPK signaling	YER129W	SAK1
AMPK signaling	YDR422C	SIP1
AMPK signaling	YGL208W	SIP2
AMPK signaling	YDL047W	SIT4
AMPK signaling	YDR477W	SNF1
AMPK signaling	YGL115W	SNF4
Citrate metabolsim	YNR001C	CIT1
Citrate metabolsim	YCR005C	CIT2
Citrate metabolsim	YPR001W	CIT3
Citrate metabolsim	YBR291C	CTP1
Citrate metabolsim	YOL067C	RTG1
Citrate metabolsim	YGL252C	RTG2
Fatty acid oxidation	YML042W	CAT2
Fatty acid oxidation	YKR009C	FOX2
Fatty acid oxidation	YGL205W	POX1
Fatty acid oxidation	YPL147W	PXA1
Fatty acid oxidation	YKL188C	PXA2
Glucose signaling and metabolism	YFR019W	FAB1
Glucose signaling and metabolism	YLR081W	GAL2
Glucose signaling and metabolism	YCL040W	GLK1
Glucose signaling and metabolism	YER020W	GPA2
Glucose signaling and metabolism	YOR371C	GPB1
Glucose signaling and metabolism	YAL056W	GPB2
Glucose signaling and metabolism	YDL035C	GPR1
Glucose signaling and metabolism	YJR090C	GRR1
Glucose signaling and metabolism	YFR053C	HXK1
Glucose signaling and metabolism	YGL253W	HXK2
Glucose signaling and metabolism	YHR094C	HXT1
Glucose signaling and metabolism	YFL011W	HXT10
Glucose signaling and metabolism	YIL170W	HXT12
Glucose signaling and metabolism	YMR011W	HXT2
Glucose signaling and metabolism	YDR345C	HXT3
Glucose signaling and metabolism	YHR092C	HXT4
Glucose signaling and metabolism	YHR096C	HXT5
Glucose signaling and metabolism	YJL214W	HXT8
Glucose signaling and metabolism	YOL081W	IRA2
Glucose signaling and metabolism	YDR277C	MTH1
Glucose signaling and metabolism	YGL248W	PDE1
Glucose signaling and metabolism	YOR360C	PDE2
Glucose signaling and metabolism	YGR240C	PFK1
Glucose signaling and metabolism	YMR205C	PFK2
Glucose signaling and metabolism	YOR101W	RAS1
Glucose signaling and metabolism	YNL098C	RAS2
Glucose signaling and metabolism	YKL038W	RGT1
Glucose signaling and metabolism	YDL138W	RGT2
Glucose signaling and metabolism	YHR205W	SCH9
Glucose signaling and metabolism	YLL016W	SDC25
Glucose signaling and metabolism	YDL194W	SNF3
Glucose signaling and metabolism	YOR047C	STD1
Glucose signaling and metabolism	YPL180W	TCO89
Glucose signaling and metabolism	YJR066W	TOR1
Glucose signaling and metabolism	YGL179C	TOS3
Glucose signaling and metabolism	YJL164C	TPK1
Glucose signaling and metabolism	YPL203W	TPK2
Glucose signaling and metabolism	YKL166C	TPK3
Glucose signaling and metabolism	YHR135C	YCK1
Glucose signaling and metabolism	YNL154C	YCK2
Glycerol metabolism	YDL022W	GPD1
Glycerol metabolism	YOL059W	GPD2
Glycerol metabolism	YIL053W	GPP1
Glycerol metabolism	YER062C	GPP2
Glycerol metabolism	YHL032C	GUT1
Glycerol metabolism	YIL155C	GUT2
Sphingolipid metabolism	YJL196C	ELO1
Sphingolipid metabolism	YCR034W	ELO2
Sphingolipid metabolism	YLR372W	ELO3
Sphingolipid metabolism	YML008C	ERG6
Sphingolipid metabolism	YKL008C	LAC1
Sphingolipid metabolism	YHL003C	LAG1
Sphingolipid metabolism	YGR038W	ORM1
Sphingolipid metabolism	YLR350W	ORM2
Sphingolipid metabolism	YPL057C	SUR1
Sphingolipid metabolism	YDR297W	SUR2
Sphingolipid metabolism	YBR058C-A	TSC3
Trehalose metabolism	YJR153W	PGU1
Trehalose metabolism	YBR126C	TPS1
Trehalose metabolism	YDR074W	TPS2
Trehalose metabolism	YMR261C	TPS3
Trehalose metabolism	YML100W	TSL1
