# Supplementary material for: Fine-tuning acetyl-CoA carboxylase 1 activity through localization: functional genomics reveals a role for the lysine acetyltransferase NuA4 and sphingolipid metabolism in regulating Acc1 activity and localization
Source: Genetics. 2022 May 24;221(4):iyac086. doi: 10.1093/genetics/iyac086 (PMC9339284; doi:10.1093/genetics/iyac086)
Supplement: iyac086_Table_S2 [file iyac086_table_s2.xlsx]

## Sheet: Sheet1
OKB#	genotype	background	Mat	Note
1079	WT BY4741	his3Δ1 leu2Δ0 met15Δ0 ura3Δ0	a	Gift from Kaern Lab
3453	eaf1Δ::NAT	his3Δ1 leu2Δ0 met15Δ0 ura3Δ0	a	This Study
3333	eaf1Δ::KAN	his3Δ1 leu2Δ0 met15Δ0 ura3Δ0	a	DMA
3292	eaf7Δ::KAN	his3Δ1 leu2Δ0 met15Δ0 ura3Δ0	a	DMA
3913	elo2Δ::KAN	his3Δ1 leu2Δ0 met15Δ0 ura3Δ0	a	DMA?
3914	elo3Δ::KAN	his3Δ1 leu2Δ0 met15Δ0 ura3Δ0	a	DMA?
1118	WT BY4742	his3Δ1 leu2Δ0 ura3Δ0 lys2Δ0	α	Gift from Kaern Lab
3954	ACC1-GFP::HIS	his3Δ1 leu2Δ0 met15Δ0 ura3Δ0	a	GFP Collection
4448	eaf1Δ::NAT ACC1-GFP::HIS	his3Δ1 leu2Δ0 met15Δ0 ura3Δ0	a	This Study
4593	elo2Δ::KAN ACC1-GFP::HIS	his3Δ1 leu2Δ0 met15Δ0 ura3Δ0	a	This Study
4594	elo3Δ::KAN ACC1-GFP::HIS	his3Δ1 leu2Δ0 met15Δ0 ura3Δ0	a	This Study
4599	tsc3Δ::KAN ACC1-GFP::HIS	his3Δ1 leu2Δ0 met15Δ0 ura3Δ0	a	This Study
4601	acb1Δ::KAN ACC1-GFP::HIS	his3Δ1 leu2Δ0 met15Δ0 ura3Δ0	a	This Study
4609	lcb1-100 ACC1-GFP::HIS	his3Δ1 leu2Δ0 met15Δ0 ura3Δ0	a	This Study
4348	snf1Δ::KAN ACC1-GFP::HIS	his3Δ1 leu2Δ0 met15Δ0 ura3Δ0	a	This Study
4364	snf1Δ::KAN eaf1Δ::NAT ACC1-GFP::HIS	his3Δ1 leu2Δ0 met15Δ0 ura3Δ0	a	This Study
4115	esa1-ts ACC1-GFP::HIS	his3-Δ200 leu2-3,112 trp-1Δ1 ura3-52 ade2-101	a	This Study
4305	ACC1-TAP::TRP lys2D	his3-Δ200(or his3Δ1) leu2-3,1112(or leu2Δ0) ura3-52(or ura3Δ0) trp1-Δ1 lys2Δ0	a	This Study
4306	esa1-ts ACC1-TAP::TRP lys2D	his3-Δ200(or his3Δ1) leu2-3,1112(or leu2Δ0) ura3-52(or ura3Δ0) trp1-Δ1 lys2Δ0	a	This Study
4629	if38Δ::KAN ACC1-GFP::HIS	his3Δ1 leu2Δ0 met15Δ0 ura3Δ0	a	This Study
4675	if38Δ::KAN	his3Δ1 leu2Δ0 met15Δ0 ura3Δ0	a	This Study
3228	tsc3Δ::KAN	his3Δ1 leu2Δ0 met15Δ0 ura3Δ0	a	DMA
3389	snf1Δ::KAN	his3Δ1 leu2Δ0 met15Δ0 ura3Δ0	a	DMA
3421	snf1Δ::KAN eaf1Δ::NAT	his3Δ1 leu2Δ0 met15Δ0 ura3Δ0	a	This Study
4401	acc1-S1157A-GFP::HIS	his3Δ1 leu2Δ0 met15Δ0 ura3Δ0	a	This Study
4404	acc1-S1157A-GFP::HIS eaf1Δ::NAT	his3Δ1 leu2Δ0 met15Δ0 ura3Δ0	a	This Study
4303	esa1::HIS esa1-L254P::URA ACC1-GFP::HIS	his3-Δ200(or his3Δ1) leu2-3,1112(or leu2Δ0) ura3-52(or ura3Δ0) met15Δ0 lys2Δ0	a	This Study
Note: Strains that express tagged ACC1 (GFP and TAP) were used only when absolutely needed like for Acc1 purification, microscopy or western blot. For any other experiments (e.g. flux assay, citrate assay, FAS asay, bioscreen etc) normal deletion without Acc1 tagging were used.
