# Supplementary material for: Fine-tuning acetyl-CoA carboxylase 1 activity through localization: functional genomics reveals a role for the lysine acetyltransferase NuA4 and sphingolipid metabolism in regulating Acc1 activity and localization
Source: Genetics. 2022 May 24;221(4):iyac086. doi: 10.1093/genetics/iyac086 (PMC9339284; doi:10.1093/genetics/iyac086)
Supplement: iyac086_Table_S3 [file iyac086_table_s3.xlsx]

## Sheet: Read Me
Data from the lipidomic analysis comparing WT, eaf1D, and soraphen A treated WT yeast.
The raw and processes data from the lipidomic analysis can be found in the sheets of this file.
Lipidomic analysis was done through Lipotype GmbH in Germany.
Sheet list:
% of total lipids (plotted): This is the final n=3 data that was plotted for Figure 7A
Lipid Class pmol and % total: Raw lipid class data from lipotype, data was also normalized to protein concentration, finally the percentage each lipid class type of the total lipids.
Raw Lipids Species pmol: All raw data from Lipotype broken down by identified species.
Chain length (plotted): This is the final n=3 data that was plotted for for Figure 7B
Percent at each C length: Lipid classes divided into chain lengths. The percent of each chain length of the class were calculated using the pmol lipid species data.

## Sheet: % of total lipids (plotted)
	Lipid class % of total lipids n=3
	WT-1	WT-2	WT-3	eaf1D-1	eaf1D-2	eaf1D-3	WT-SorA-1	WT-SorA-2	WT-SorA-3
PA	8.80832	7.70911	7.16811	7.03156	7.82717	7.38791	7.55841	7.36992	6.58772
PC	20.0125	19.3998	18.1003	14.6063	15.6417	19.0643	15.7808	14.8365	14.7513
PE	14.5878	15.9457	15.1623	12.2529	13.9413	13.5505	10.2783	10.1163	9.79952
PI	24.6028	25.6457	27.2298	27.0628	24.0235	23.2713	30.7752	28.7209	33.24
PS	3.35374	3.87234	3.94139	2.79085	3.04049	2.8386	2.80331	2.71695	2.74313
DAG	9.87709	10.8278	10.5717	9.90353	11.5355	11.096	11.6561	15.4665	12.3183
EE	3.24395	2.076	2.2365	8.40897	8.32993	7.29996	2.32918	2.37831	2.12523
TAG	4.62894	4.17769	3.90496	6.21009	7.18346	6.38718	5.6971	5.81952	6.3158

## Sheet: Lipid Class pmol and %total
Raw pmol data
class	WT-1	WT-2	WT-3	eaf1D-1	eaf1D-2	eaf1D-3	WT-SorA-1	WT-SorA-2	WT-SorA-3
cohort	WT	WT	WT	eaf1D	eaf1D	eaf1D	WT-SorA	WT-SorA	WT-SorA
CDP-DAG	0.459177	1.14193	0.615702	2.6891	3.05025	2.51025	0	0.161668	0.0811925
Cer	21.1065	24.9201	35.8115	38.1593	39.7522	33.002	38.0237	41.9642	45.6316
CL	12.9344	13.912	16.4297	85.5095	28.154	22.4531	1.15907	0.73652	0
DAG	650.69	846.47	897.085	986.722	954.324	898.956	780.534	1109.33	888.799
EE	213.707	162.293	189.783	837.814	689.128	591.415	155.97	170.584	153.342
IPC	339.949	420.202	412.964	223.961	162.276	110.632	509.655	476.169	527.435
LPA	1.5022	1.56448	1.90462	10.6959	9.92127	11.0366	1.75066	1.91614	1.75696
LPC	45.5705	52.433	58.9148	109.152	276.291	96.671	40.9818	35.9041	38.5326
LPE	31.0343	45.9527	53.5814	56.8208	74.3952	44.3341	15.2189	14.4842	20.3029
LPI	25.1848	31.0159	37.9283	75.3788	78.5712	46.0548	21.3899	19.6642	24.8104
LPS	1.58334	3.34702	3.48983	3.2626	2.03673	2.89989	2.67239	3.33101	3.7333
M(IP)2C	147.816	118.111	268.194	502.297	0	315.326	213.992	279.948	181.609
MIPC	89.5373	96.1995	101.715	61.0668	26.8359	52.3065	33.8229	27.6722	30.5325
PA	580.281	602.665	608.265	700.577	647.535	598.54	506.137	528.608	475.324
PC	1318.4	1516.59	1535.93	1455.28	1294.03	1544.52	1056.74	1064.15	1064.35
PE	961.028	1246.56	1286.63	1220.8	1153.35	1097.81	688.267	725.591	707.064
PG	0.398426	0	0	0	0	0.367761	0	0	0
PI	1620.8	2004.87	2310.64	2696.36	1987.45	1885.35	2060.81	2060.01	2398.37
PS	220.94	302.723	334.455	278.061	251.537	229.972	187.719	194.874	197.925
TAG	304.949	326.594	331.363	618.732	594.282	517.465	381.497	417.405	455.704
SUM	6587.87	7817.57	8485.71	9963.34	8272.91	8101.62	6696.33	7172.51	7215.3
Protein concentration	1.93702	2.02151	1.79877	2.05223	2.40553	2.48233	1.81413	1.92934	1.52227
Normalized to protein level
cohort	WT	WT	WT	eaf1D	eaf1D	eaf1D	WT-SorA	WT-SorA	WT-SorA
CDP-DAG	0.237053	0.564889	0.34229	1.31033	1.26802	1.01124	0	0.0837945	0.0533363
Cer	10.8964	12.3275	19.9089	18.5941	16.5253	13.2947	20.9597	21.7506	29.976
CL	6.6775	6.88202	9.13382	41.6667	11.7038	9.04514	0.638914	0.381747	0
DAG	335.923	418.732	498.721	480.805	396.721	362.141	430.252	574.98	583.863
EE	110.328	80.283	105.507	408.246	286.477	238.249	85.9749	88.416	100.732
IPC	175.501	207.866	229.581	109.131	67.4597	44.5677	280.936	246.804	346.479
LPA	0.77552	0.77392	1.05884	5.21185	4.12436	4.44607	0.965014	0.993156	1.15417
LPC	23.5261	25.9376	32.7528	53.187	114.857	38.9436	22.5903	18.6095	25.3125
LPE	16.0217	22.7319	29.7878	27.6874	30.9268	17.8598	8.3891	7.50732	13.3372
LPI	13.0018	15.343	21.0857	36.7303	32.6627	18.553	11.7907	10.1922	16.2983
LPS	0.817411	1.65571	1.94012	1.58978	0.846686	1.16821	1.47309	1.7265	2.45245
M(IP)2C	76.3112	58.4273	149.098	244.757	0	127.028	117.958	145.101	119.301
MIPC	46.2243	47.5881	56.547	29.7564	11.1559	21.0715	18.6441	14.3428	20.0572
PA	299.574	298.127	338.156	341.374	269.186	241.12	278.997	273.984	312.246
PC	680.633	750.229	853.88	709.121	537.938	622.205	582.502	551.563	699.183
PE	496.137	616.652	715.283	594.866	479.459	442.248	379.392	376.082	464.479
PG	0.20569	0	0	0	0	0.148151	0	0	0
PI	836.75	991.772	1284.57	1313.87	826.199	759.506	1135.97	1067.73	1575.52
PS	114.062	149.751	185.935	135.492	104.566	92.6436	103.476	101.005	130.019
TAG	157.432	161.56	184.217	301.493	247.048	208.459	210.292	216.346	299.358
SUM	3401.03	3867.2	4717.5	4854.89	3439.12	3263.71	3691.2	3717.6	4739.82
% total lipid
cohort	WT	WT	WT	eaf1D	eaf1D	eaf1D	WT-SorA	WT-SorA	WT-SorA
CDP-DAG	0.00697003	0.0146072	0.00725575	0.02699	0.0368703	0.0309845	0	0.002254	0.00112528
Cer	0.320384	0.318771	0.422022	0.382997	0.48051	0.40735	0.567828	0.585071	0.632428
CL	0.196337	0.177958	0.193616	0.858241	0.340315	0.277143	0.0173091	0.0102687	0
DAG	9.87709	10.8278	10.5717	9.90353	11.5355	11.096	11.6561	15.4665	12.3183
EE	3.24395	2.076	2.2365	8.40897	8.32993	7.29996	2.32918	2.37831	2.12523
IPC	5.16022	5.3751	4.86658	2.24785	1.96154	1.36555	7.61095	6.63881	7.30996
LPA	0.0228025	0.0200124	0.022445	0.107353	0.119925	0.136227	0.0261436	0.026715	0.0243505
LPC	0.691734	0.670707	0.694282	1.09553	3.33971	1.19323	0.612003	0.500579	0.53404
LPE	0.471082	0.587812	0.631431	0.570299	0.899263	0.547225	0.227273	0.20194	0.281386
LPI	0.38229	0.396746	0.446966	0.756562	0.94974	0.568465	0.319426	0.27416	0.343858
LPS	0.0240342	0.042814	0.041126	0.032746	0.0246192	0.035794	0.0399082	0.0464413	0.0517415
M(IP)2C	2.24376	1.51084	3.16053	5.04146	0	3.89213	3.19565	3.90308	2.517
MIPC	1.35912	1.23055	1.19866	0.612915	0.324383	0.64563	0.505096	0.385809	0.423163
PA	8.80832	7.70911	7.16811	7.03156	7.82717	7.38791	7.55841	7.36992	6.58772
PC	20.0125	19.3998	18.1003	14.6063	15.6417	19.0643	15.7808	14.8365	14.7513
PE	14.5878	15.9457	15.1623	12.2529	13.9413	13.5505	10.2783	10.1163	9.79952
PG	0.00604787	0	0	0	0	0.00453935	0	0	0
PI	24.6028	25.6457	27.2298	27.0628	24.0235	23.2713	30.7752	28.7209	33.24
PS	3.35374	3.87234	3.94139	2.79085	3.04049	2.8386	2.80331	2.71695	2.74313
TAG	4.62894	4.17769	3.90496	6.21009	7.18346	6.38718	5.6971	5.81952	6.3158
SUM	100	100	100	100	100	100	100	100	100

## Sheet: RAW Lipid species pmol
feature	class	structuralcategory	functionalcategory	totallength	totaldb	totaloh	fullname	WT-1	WT-2	WT-3	eaf1D-1	eaf1D-2	eaf1D-3	WT-SorA-1	WT-SorA-2	WT-SorA-3
CDP-DAG 32:1;0	CDP-DAG	GPL	MEM	32	1	0		0.257482	0.289305	0.244604	0.684565	0.732266	0.620276	NA	0.161668	NA
CDP-DAG 32:2;0	CDP-DAG	GPL	MEM	32	2	0		NA	0.15988	0.112402	0.414261	0.592036	0.477053	NA	NA	NA
CDP-DAG 34:1;0	CDP-DAG	GPL	MEM	34	1	0		NA	0.441967	NA	0.908128	0.882827	0.755975	NA	NA	NA
CDP-DAG 34:2;0	CDP-DAG	GPL	MEM	34	2	0		0.201695	0.250774	0.258696	0.682149	0.84312	0.656942	NA	NA	0.0811925
Cer 32:0;2	Cer	SL	MEM	32	0	2		0.354095	0.354516	0.586051	0.765816	1.00901	1.21763	1.49461	1.82646	2.60284
Cer 32:1;2	Cer	SL	MEM	32	1	2		NA	NA	NA	NA	NA	NA	0.155695	0.238076	0.232847
Cer 34:0;2	Cer	SL	MEM	34	0	2		0.300216	0.507646	0.589184	0.70718	1.19779	1.09283	1.18699	2.27547	1.71908
Cer 34:0;3	Cer	SL	MEM	34	0	3		0.200858	0.225202	0.295318	0.771085	0.848491	0.859445	1.4015	1.44746	1.5953
Cer 34:0;4	Cer	SL	MEM	34	0	4		NA	NA	NA	0.232861	0.295227	0.261432	0.427216	0.496822	0.585679
Cer 36:0;2	Cer	SL	MEM	36	0	2		0.237002	0.315359	0.462422	0.505586	0.857945	0.827433	0.734587	1.54497	0.98679
Cer 36:0;3	Cer	SL	MEM	36	0	3		0.150218	NA	0.256173	0.398512	0.501057	0.388261	0.398366	0.398669	0.4158
Cer 36:1;4	Cer	SL	MEM	36	1	4		NA	0.474254	0.635871	0.571757	0.436103	0.367019	NA	0.250425	0.214371
Cer 38:0;2	Cer	SL	MEM	38	0	2		NA	NA	NA	NA	0.202001	0.25721	0.234282	0.447699	0.32283
Cer 38:0;3	Cer	SL	MEM	38	0	3		NA	NA	NA	0.264935	0.255103	0.169093	0.297607	0.265558	0.34893
Cer 38:0;4	Cer	SL	MEM	38	0	4		NA	NA	NA	0.385543	0.334932	0.347961	0.488168	0.489693	0.550203
Cer 38:1;4	Cer	SL	MEM	38	1	4		NA	NA	NA	NA	NA	NA	NA	NA	NA
Cer 40:0;2	Cer	SL	MEM	40	0	2		0.269222	NA	0.343053	0.576214	0.748591	0.580889	0.680901	0.866459	0.900616
Cer 40:0;3	Cer	SL	MEM	40	0	3		NA	NA	NA	NA	0.202353	NA	0.387322	0.45561	0.432324
Cer 40:0;4	Cer	SL	MEM	40	0	4		NA	NA	NA	0.3559	0.362422	0.259716	0.407703	0.427194	0.437011
Cer 42:0;2	Cer	SL	MEM	42	0	2		1.32068	1.59656	2.18126	1.56694	1.81653	1.46271	1.29321	1.53756	1.50576
Cer 42:0;3	Cer	SL	MEM	42	0	3		0.692547	0.87068	1.19519	1.36131	1.45924	1.02206	2.12789	2.45796	2.54499
Cer 42:0;4	Cer	SL	MEM	42	0	4		1.90267	2.07748	2.75332	5.44023	5.56368	4.09146	5.31483	5.45706	6.30101
Cer 42:0;5	Cer	SL	MEM	42	0	5		NA	NA	NA	NA	NA	NA	0.840245	0.887567	0.916849
Cer 42:1;2	Cer	SL	MEM	42	1	2		0.118142	NA	NA	NA	NA	NA	0.271643	0.317499	0.42144
Cer 44:0;2	Cer	SL	MEM	44	0	2		NA	NA	0.855199	0.870742	0.863581	0.708829	NA	NA	NA
Cer 44:0;3	Cer	SL	MEM	44	0	3		2.6181	2.9036	4.59669	3.26881	3.36696	2.57557	1.61895	1.42429	1.75406
Cer 44:0;4	Cer	SL	MEM	44	0	4		11.8517	14.1649	19.0414	17.1208	16.6936	14.1066	11.9897	11.6414	13.1226
Cer 44:0;5	Cer	SL	MEM	44	0	5		0.685432	0.896691	1.07718	0.72226	0.777024	0.372504	5.90174	6.42545	7.08941
Cer 44:1;2	Cer	SL	MEM	44	1	2		NA	NA	NA	NA	NA	NA	NA	NA	NA
Cer 44:1;4	Cer	SL	MEM	44	1	4		NA	NA	NA	NA	NA	NA	NA	NA	0.173133
Cer 46:0;2	Cer	SL	MEM	46	0	2		NA	NA	NA	NA	NA	NA	NA	NA	NA
Cer 46:0;3	Cer	SL	MEM	46	0	3		NA	NA	0.200198	0.407435	0.391012	0.390135	NA	NA	NA
Cer 46:0;4	Cer	SL	MEM	46	0	4		0.405585	0.533243	0.743011	1.86539	1.56951	1.64317	0.370497	0.384881	0.457727
CL 56:1;0	CL	GPL	MEM	56	1	0		0.298248	NA	NA	NA	NA	0.817448	NA	NA	NA
CL 58:1;0	CL	GPL	MEM	58	1	0		0.593926	NA	0.783749	NA	NA	NA	NA	NA	NA
CL 58:3;0	CL	GPL	MEM	58	3	0		NA	NA	NA	NA	1.75772	NA	NA	NA	NA
CL 62:1;0	CL	GPL	MEM	62	1	0		0.369005	NA	NA	NA	NA	NA	NA	NA	NA
CL 62:2;0	CL	GPL	MEM	62	2	0		1.47667	1.99988	2.05461	3.16411	3.2231	3.46403	0.582724	NA	NA
CL 62:3;0	CL	GPL	MEM	62	3	0		0.485152	0.534722	NA	1.90258	1.59234	2.0733	NA	NA	NA
CL 66:0;0	CL	GPL	MEM	66	0	0		NA	NA	NA	15.6386	NA	NA	NA	NA	NA
CL 66:2;0	CL	GPL	MEM	66	2	0		NA	NA	NA	29.269	NA	NA	NA	NA	NA
CL 66:4;0	CL	GPL	MEM	66	4	0		1.81161	2.37472	2.6018	7.30761	7.5844	7.15262	NA	NA	NA
CL 68:2;0	CL	GPL	MEM	68	2	0		2.69168	3.46849	3.8714	2.38903	3.11341	2.26497	0.576351	0.73652	NA
CL 68:3;0	CL	GPL	MEM	68	3	0		1.8316	2.29179	2.46876	NA	NA	NA	NA	NA	NA
CL 68:4;0	CL	GPL	MEM	68	4	0		1.87293	2.24593	2.50257	4.5292	6.39323	4.84743	NA	NA	NA
CL 70:0;0	CL	GPL	MEM	70	0	0		NA	NA	NA	11.2322	NA	NA	NA	NA	NA
CL 70:4;0	CL	GPL	MEM	70	4	0		0.853683	0.996503	0.8795	1.71281	2.1716	1.83326	NA	NA	NA
CL 72:2;0	CL	GPL	MEM	72	2	0		0.649941	NA	1.26727	1.77998	2.31815	NA	NA	NA	NA
CL 74:2;0	CL	GPL	MEM	74	2	0		NA	NA	NA	6.58435	NA	NA	NA	NA	NA
DAG 10:0;0-16:0;0	DAG	GL	MEM	26	0	0		18.962	26.5288	28.3196	35.3873	35.6833	38.0159	40.1381	56.6867	45.2767
DAG 10:0;0-17:0;0	DAG	GL	MEM	27	0	0		NA	NA	NA	NA	0.487821	NA	NA	1.20902	1.24095
DAG 10:0;0-18:0;0	DAG	GL	MEM	28	0	0		4.54712	6.14715	6.71236	7.4165	7.07867	7.98545	9.79718	13.4782	9.80569
DAG 10:0;0-18:1;0	DAG	GL	MEM	28	1	0		1.02103	1.25928	1.286	1.73297	1.64098	1.84561	0.922059	1.1717	1.03637
DAG 11:0;0-16:0;0	DAG	GL	MEM	27	0	0		NA	NA	NA	0.667249	0.399538	NA	0.248094	NA	0.208145
DAG 12:0;0-14:0;0	DAG	GL	MEM	26	0	0		3.21362	4.51365	4.41975	9.56877	9.941	11.4461	12.0106	16.3239	15.2739
DAG 12:0;0-15:0;0	DAG	GL	MEM	27	0	0		NA	NA	NA	1.98268	1.57583	NA	4.2595	3.0253	3.19038
DAG 12:0;0-16:0;0	DAG	GL	MEM	28	0	0		24.5401	31.924	33.4034	56.2525	56.7292	63.4374	59.8306	85.3128	64.9529
DAG 12:0;0-16:1;0	DAG	GL	MEM	28	1	0		10.5406	14.1089	13.7885	20.1026	20.9192	20.5999	17.8469	25.5055	21.3282
DAG 12:0;0-17:0;0	DAG	GL	MEM	29	0	0		NA	NA	NA	NA	NA	NA	0.859744	NA	NA
DAG 12:0;0-18:0;0	DAG	GL	MEM	30	0	0		4.19177	5.1233	4.90952	6.89547	6.38891	6.14219	6.74058	9.72728	7.74468
DAG 12:0;0-18:1;0	DAG	GL	MEM	30	1	0		1.88146	2.52168	2.34718	2.96602	3.17432	3.17761	1.82765	2.77124	2.42448
DAG 12:1;0-16:0;0	DAG	GL	MEM	28	1	0		0.259421	0.324351	0.382236	0.333705	0.299841	0.313066	0.507335	0.290493	0.52064
DAG 13:0;0-16:0;0	DAG	GL	MEM	29	0	0		NA	NA	NA	NA	NA	NA	0.231919	NA	NA
DAG 14:0;0-14:0;0	DAG	GL	MEM	28	0	0		1.99874	2.56799	2.35278	8.00842	8.55434	9.68605	5.03904	6.39613	5.00735
DAG 14:0;0-14:1;0	DAG	GL	MEM	28	1	0		0.84026	1.31187	1.06978	4.00985	4.3679	4.50671	3.05137	3.46651	3.26783
DAG 14:0;0-15:0;0	DAG	GL	MEM	29	0	0		NA	NA	NA	NA	NA	NA	0.870117	NA	NA
DAG 14:0;0-16:0;0	DAG	GL	MEM	30	0	0		10.5137	12.1623	12.558	29.0759	28.6853	26.7927	12.759	17.4135	14.1471
DAG 14:0;0-16:1;0	DAG	GL	MEM	30	1	0		23.8696	32.5244	31.8296	55.3005	55.7291	56.2966	34.7224	46.7768	39.8554
DAG 14:0;0-18:0;0	DAG	GL	MEM	32	0	0		NA	NA	NA	NA	NA	NA	NA	NA	NA
DAG 14:0;0-18:1;0	DAG	GL	MEM	32	1	0		21.9637	28.1575	28.7538	40.453	39.0859	40.7927	18.0079	25.0206	21.5197
DAG 14:0;0-18:2;0	DAG	GL	MEM	32	2	0		NA	NA	NA	NA	NA	0.169964	0.276052	0.417825	0.428299
DAG 14:1;0-16:0;0	DAG	GL	MEM	30	1	0		4.88575	6.5888	6.44435	13.9791	14.1511	14.0689	10.3216	13.8095	11.1554
DAG 14:1;0-16:1;0	DAG	GL	MEM	30	2	0		3.4717	5.64401	5.02789	9.73236	7.62985	7.84415	5.84558	8.32525	6.07973
DAG 14:1;0-18:0;0	DAG	GL	MEM	32	1	0		0.612914	0.719134	1.02205	2.28552	2.17723	1.96996	1.28959	1.82718	1.55804
DAG 14:1;0-18:1;0	DAG	GL	MEM	32	2	0		0.513528	NA	0.985574	1.38282	1.25166	1.35696	0.869978	1.26642	1.04339
DAG 15:0;0-15:0;0	DAG	GL	MEM	30	0	0		NA	NA	NA	0.108166	NA	NA	NA	NA	NA
DAG 15:0;0-16:0;0	DAG	GL	MEM	31	0	0		NA	NA	NA	2.52453	NA	NA	NA	3.06974	NA
DAG 15:0;0-16:1;0	DAG	GL	MEM	31	1	0		1.95334	2.2022	2.62201	5.97697	4.80524	4.12739	6.90508	8.73761	7.90487
DAG 15:0;0-18:1;0	DAG	GL	MEM	33	1	0		1.84027	2.24872	2.8515	4.47668	4.19535	2.8177	3.94614	4.58323	3.64667
DAG 15:1;0-16:0;0	DAG	GL	MEM	31	1	0		0.305183	0.677769	0.69547	1.97918	1.68319	1.33631	2.02044	2.70149	2.13882
DAG 16:0;0-16:0;0	DAG	GL	MEM	32	0	0		NA	NA	NA	NA	NA	NA	NA	NA	NA
DAG 16:0;0-16:1;0	DAG	GL	MEM	32	1	0		128.045	164.97	180.094	204.552	195.728	183.423	164.457	240.255	192.851
DAG 16:0;0-17:1;0	DAG	GL	MEM	33	1	0		0.250438	0.286767	0.2647	0.806979	0.882757	0.508974	0.961185	1.34555	1.11237
DAG 16:0;0-18:1;0	DAG	GL	MEM	34	1	0		124.202	155.194	173.901	142.546	137.681	127.582	86.2912	127.99	104.148
DAG 16:0;0-18:2;0	DAG	GL	MEM	34	2	0		0.441444	1.06583	1.05041	0.425856	0.399408	0.641331	NA	NA	1.8664
DAG 16:1;0-16:1;0	DAG	GL	MEM	32	2	0		108.913	149.117	155.019	139.892	136.533	114.554	133.577	192.655	149.773
DAG 16:1;0-17:0;0	DAG	GL	MEM	33	1	0		0.878653	1.20299	1.1496	1.36167	1.21075	1.14331	1.87653	2.72932	2.20283
DAG 16:1;0-18:0;0	DAG	GL	MEM	34	1	0		19.334	26.0236	28.0197	31.1642	27.8128	26.8317	23.3946	32.1271	25.7395
DAG 16:1;0-18:1;0	DAG	GL	MEM	34	2	0		101.128	127.462	129.505	112.893	109.486	94.091	90.274	129.898	99.0439
DAG 16:1;0-18:2;0	DAG	GL	MEM	34	3	0		NA	NA	NA	NA	NA	NA	2.30914	NA	2.59676
DAG 17:0;0-18:1;0	DAG	GL	MEM	35	1	0		NA	NA	NA	NA	NA	NA	NA	NA	NA
DAG 18:0;0-18:1;0	DAG	GL	MEM	36	1	0		20.3661	27.9359	28.6511	24.0967	22.2499	20.0033	12.946	18.4792	14.0383
DAG 18:1;0-18:1;0	DAG	GL	MEM	36	2	0		5.20579	5.95594	7.64918	6.38456	5.70518	5.44811	3.3023	4.5393	4.67137
EE 14:0;0	EE	STE	STO	14	0	0		NA	NA	NA	16.6086	16.7047	16.3233	NA	NA	NA
EE 16:0;0	EE	STE	STO	16	0	0		87.2737	67.6979	75.2911	222.646	194.72	165.701	60.7438	64.8784	60.7977
EE 16:1;0	EE	STE	STO	16	1	0		101.19	74.431	91.2406	411.275	389.724	323.439	82.8108	88.1061	76.7225
EE 18:0;0	EE	STE	STO	18	0	0		NA	NA	NA	85.1576	NA	NA	NA	NA	NA
EE 18:1;0	EE	STE	STO	18	1	0		25.2437	20.1637	23.2513	102.127	87.9791	85.9513	12.4152	17.5999	15.8218
IPC 38:0;3	IPC	SL	MEM	38	0	3		NA	NA	NA	NA	NA	NA	2.21455	2.33935	2.64377
IPC 38:0;4	IPC	SL	MEM	38	0	4		NA	NA	NA	NA	NA	2.34581	4.65671	4.02468	4.91886
IPC 38:1;2	IPC	SL	MEM	38	1	2		3.15565	5.16306	3.06328	4.41714	9.6504	1.90647	4.26338	4.13712	3.87463
IPC 40:0;4	IPC	SL	MEM	40	0	4		NA	NA	NA	NA	NA	NA	3.86362	3.42296	4.27016
IPC 42:0;3	IPC	SL	MEM	42	0	3		6.88927	8.87532	9.60037	11.5294	12.9803	5.91531	16.1121	12.6418	15.6494
IPC 42:0;4	IPC	SL	MEM	42	0	4		28.1955	29.1759	27.6328	52.0398	46.1278	29.4098	73.4521	65.3336	74.8207
IPC 42:0;5	IPC	SL	MEM	42	0	5		NA	NA	NA	4.45635	NA	1.61439	31.3804	26.3589	27.2907
IPC 44:0;3	IPC	SL	MEM	44	0	3		48.0929	73.5216	80.5701	23.9192	19.6719	12.7917	24.309	22.783	28.8501
IPC 44:0;4	IPC	SL	MEM	44	0	4		225.46	270.656	257.385	93.7854	55.8033	43.9915	132.453	134.178	152.736
IPC 44:0;5	IPC	SL	MEM	44	0	5		22.984	25.8242	27.2577	24.5386	13.4612	8.83607	213.889	198.11	208.938
IPC 46:0;3	IPC	SL	MEM	46	0	3		NA	NA	NA	NA	NA	NA	NA	NA	NA
IPC 46:0;4	IPC	SL	MEM	46	0	4		5.1712	6.9861	7.45481	9.27523	4.58149	3.821	3.06094	2.83955	3.44307
IPC 46:0;5	IPC	SL	MEM	46	0	5		NA	NA	NA	NA	NA	NA	NA	NA	NA
LPA 16:0;0	LPA	GPL	LYS	16	0	0		0.394892	0.434061	0.498476	3.02884	2.83178	2.6882	0.676359	0.719767	0.707619
LPA 16:1;0	LPA	GPL	LYS	16	1	0		0.598848	0.614731	0.794598	3.74088	3.43683	4.26642	0.715378	0.832371	0.709997
LPA 18:1;0	LPA	GPL	LYS	18	1	0		0.508457	0.515692	0.611543	3.92618	3.50129	4.08201	0.358925	0.363998	0.339348
LPA 18:2;0	LPA	GPL	LYS	18	2	0		NA	NA	NA	NA	0.151365	NA	NA	NA	NA
LPC 14:0;0	LPC	GPL	LYS	14	0	0		0.9207	1.06807	1.03979	6.31376	11.6733	6.22022	1.73026	1.37505	1.67043
LPC 14:1;0	LPC	GPL	LYS	14	1	0		0.505245	0.687358	0.698828	2.85128	NA	3.21619	NA	NA	0.628852
LPC 16:0;0	LPC	GPL	LYS	16	0	0		7.32205	9.12789	10.343	14.994	37.0354	8.23937	12.1936	10.0545	11.4253
LPC 16:1;0	LPC	GPL	LYS	16	1	0		27.1801	30.4344	34.2242	60.9484	158.271	57.6573	21.4674	19.516	18.8719
LPC 18:0;0	LPC	GPL	LYS	18	0	0		1.22424	1.33196	1.69236	1.51577	NA	0.837141	1.45795	1.39999	1.99216
LPC 18:1;0	LPC	GPL	LYS	18	1	0		8.41821	9.78333	10.9166	22.5286	69.3115	20.5008	4.13256	3.55851	3.94397
LPE 14:0;0	LPE	GPL	LYS	14	0	0		0.544686	0.823082	0.895265	1.56593	NA	1.16981	0.561039	0.416773	0.587232
LPE 16:0;0	LPE	GPL	LYS	16	0	0		13.2415	17.5218	23.3237	9.75159	8.08268	4.18409	7.21942	7.00319	11.1313
LPE 16:1;0	LPE	GPL	LYS	16	1	0		7.8573	11.5928	12.6305	15.2363	12.6836	12.3599	4.96057	4.88908	5.65832
LPE 18:0;0	LPE	GPL	LYS	18	0	0		0.580658	1.16706	1.3643	0.852009	2.38316	0.366132	0.330935	NA	0.416262
LPE 18:1;0	LPE	GPL	LYS	18	1	0		8.15217	13.2536	13.6977	25.965	36.1159	23.5158	2.14698	2.17513	2.50976
LPE 20:1;0	LPE	GPL	LYS	20	1	0		0.658	1.59433	1.66995	3.44997	15.1299	2.73839	NA	NA	NA
LPI 10:0;0	LPI	GPL	LYS	10	0	0		0.29231	0.363491	0.536128	0.757485	NA	0.622433	0.997461	1.10565	1.56897
LPI 12:0;0	LPI	GPL	LYS	12	0	0		0.20107	0.263879	0.36829	0.668428	NA	0.611098	0.275047	0.339773	0.492273
LPI 14:1;0	LPI	GPL	LYS	14	1	0		NA	NA	NA	0.428884	NA	0.390114	NA	NA	NA
LPI 16:0;0	LPI	GPL	LYS	16	0	0		12.5562	15.2074	17.5165	45.0449	40.8573	24.7639	11.3378	9.07869	10.7183
LPI 16:1;0	LPI	GPL	LYS	16	1	0		2.55565	3.30375	4.39974	6.97943	5.3298	5.67652	1.95678	1.99897	2.84454
LPI 18:0;0	LPI	GPL	LYS	18	0	0		5.2327	6.18371	8.16639	14.5004	24.1438	8.14982	5.03706	5.22711	6.77328
LPI 18:1;0	LPI	GPL	LYS	18	1	0		4.34688	5.69366	6.94122	6.99932	8.24028	5.84095	1.78571	1.91399	2.41303
LPS 12:0;0	LPS	GPL	LYS	12	0	0		NA	NA	NA	NA	NA	NA	NA	0.18601	0.238726
LPS 14:0;0	LPS	GPL	LYS	14	0	0		NA	NA	NA	NA	NA	NA	NA	NA	0.0956953
LPS 16:0;0	LPS	GPL	LYS	16	0	0		1.12371	2.56301	2.675	1.6748	NA	1.10009	2.08579	2.62937	2.7285
LPS 16:1;0	LPS	GPL	LYS	16	1	0		0.131628	0.204561	0.248212	0.452785	0.493598	0.520062	0.586599	0.515628	0.670383
LPS 16:2;0	LPS	GPL	LYS	16	2	0		NA	NA	NA	NA	NA	NA	NA	NA	NA
LPS 18:1;0	LPS	GPL	LYS	18	1	0		0.328004	0.579448	0.566617	1.13501	1.54313	1.27974	NA	NA	NA
M(IP)2C 42:0;3	M(IP)2C	SL	MEM	42	0	3		NA	NA	NA	NA	NA	2.57829	1.30506	NA	NA
M(IP)2C 42:0;4	M(IP)2C	SL	MEM	42	0	4		0.885984	0.58681	NA	10.7805	NA	9.60282	5.5323	7.8581	5.29415
M(IP)2C 44:0;3	M(IP)2C	SL	MEM	44	0	3		15.2523	15.0866	37.7574	52.8608	NA	36.6798	12.8021	14.8136	11.3181
M(IP)2C 44:0;4	M(IP)2C	SL	MEM	44	0	4		123.166	95.2356	212.676	370.47	NA	223.413	174.455	231.291	149.1
M(IP)2C 44:0;5	M(IP)2C	SL	MEM	44	0	5		0.897215	0.41548	NA	2.37119	NA	0.672652	12.2271	14.5532	9.26566
M(IP)2C 44:1;4	M(IP)2C	SL	MEM	44	1	4		NA	NA	NA	NA	NA	0.60087	NA	NA	NA
M(IP)2C 46:0;3	M(IP)2C	SL	MEM	46	0	3		1.0108	1.28456	2.57392	8.95001	NA	6.62343	NA	NA	NA
M(IP)2C 46:0;4	M(IP)2C	SL	MEM	46	0	4		6.60395	5.5021	15.1862	56.8646	NA	35.1549	7.67006	11.4325	6.63143
MIPC 42:0;3	MIPC	SL	MEM	42	0	3		1.84321	NA	NA	NA	NA	NA	NA	NA	NA
MIPC 42:0;4	MIPC	SL	MEM	42	0	4		NA	NA	NA	3.51902	NA	3.42852	NA	NA	NA
MIPC 44:0;3	MIPC	SL	MEM	44	0	3		9.65879	12.7515	14.6486	6.78462	NA	5.27825	2.37941	NA	NA
MIPC 44:0;4	MIPC	SL	MEM	44	0	4		73.7616	79.7488	83.3102	43.2821	26.8359	38.2138	22.7782	20.8405	23.204
MIPC 44:0;5	MIPC	SL	MEM	44	0	5		2.00291	NA	NA	NA	NA	NA	8.66527	6.83171	7.32848
MIPC 46:0;3	MIPC	SL	MEM	46	0	3		NA	NA	NA	NA	NA	NA	NA	NA	NA
MIPC 46:0;4	MIPC	SL	MEM	46	0	4		2.27079	3.69922	3.75626	7.48107	NA	5.38593	NA	NA	NA
PA 10:0;0-14:0;0	PA	GPL	MEM	24	0	0		NA	0.940424	NA	NA	1.90311	NA	NA	NA	NA
PA 10:0;0-16:0;0	PA	GPL	MEM	26	0	0		5.67323	7.00552	6.8796	11.057	14.0163	11.6134	9.96711	10.7478	10.8962
PA 10:0;0-16:1;0	PA	GPL	MEM	26	1	0		1.69326	2.21251	NA	NA	3.34286	2.69065	2.42497	2.59776	2.42542
PA 10:0;0-18:0;0	PA	GPL	MEM	28	0	0		2.69895	NA	NA	NA	NA	NA	NA	NA	NA
PA 10:0;0-18:1;0	PA	GPL	MEM	28	1	0		NA	1.86936	3.13872	NA	NA	NA	NA	NA	4.64567
PA 10:0;0-20:0;0	PA	GPL	MEM	30	0	0		NA	NA	NA	NA	NA	0.198466	NA	NA	NA
PA 10:0;0-22:1;0	PA	GPL	MEM	32	1	0		NA	0.391456	NA	NA	NA	NA	NA	NA	NA
PA 10:0;0-26:0;0	PA	GPL	MEM	36	0	0		NA	NA	NA	0.381882	NA	NA	NA	NA	NA
PA 12:0;0-12:0;0	PA	GPL	MEM	24	0	0		NA	NA	NA	1.5827	NA	NA	1.36027	1.41493	NA
PA 12:0;0-14:0;0	PA	GPL	MEM	26	0	0		0.226668	0.262694	0.149646	1.05977	0.860015	0.479405	0.778742	0.503024	0.417043
PA 12:0;0-15:0;0	PA	GPL	MEM	27	0	0		NA	NA	NA	0.312034	NA	NA	0.337184	NA	NA
PA 12:0;0-16:0;0	PA	GPL	MEM	28	0	0		2.1486	5.4474	5.77989	7.91234	11.3594	8.84559	7.97402	8.19781	8.84207
PA 12:0;0-16:1;0	PA	GPL	MEM	28	1	0		8.74975	8.73132	7.43471	14.5015	15.7004	12.1742	13.9288	14.9505	10.4508
PA 12:0;0-18:0;0	PA	GPL	MEM	30	0	0		0.177349	0.22217	0.312281	0.446711	0.431849	0.359047	NA	NA	0.232569
PA 12:0;0-18:1;0	PA	GPL	MEM	30	1	0		0.649232	0.839027	0.898488	3.04929	1.10267	1.21102	0.956976	0.95764	0.755897
PA 12:1;0-18:0;0	PA	GPL	MEM	30	1	0		NA	NA	NA	NA	0.493269	NA	NA	NA	NA
PA 14:0;0-14:0;0	PA	GPL	MEM	28	0	0		0.0455513	0.0969484	0.0933569	2.25841	0.657051	0.463386	0.276609	0.178254	0.406899
PA 14:0;0-14:1;0	PA	GPL	MEM	28	1	0		0.316809	0.393681	0.346612	NA	1.22906	0.895496	0.910234	0.883429	0.627765
PA 14:0;0-16:0;0	PA	GPL	MEM	30	0	0		0.396258	0.328589	0.49762	1.4865	2.17394	1.48206	0.636704	0.598085	0.410379
PA 14:0;0-16:1;0	PA	GPL	MEM	30	1	0		13.6774	16.2199	15.3727	25.3512	30.0751	24.2312	21.1389	19.9884	20.1446
PA 14:0;0-17:1;0	PA	GPL	MEM	31	1	0		NA	NA	NA	NA	NA	NA	0.175491	NA	NA
PA 14:0;0-18:0;0	PA	GPL	MEM	32	0	0		NA	NA	NA	NA	NA	NA	NA	NA	NA
PA 14:0;0-18:1;0	PA	GPL	MEM	32	1	0		12.6386	13.4934	13.0543	22.7827	18.1257	17.8451	8.78348	8.82094	9.04023
PA 14:1;0-16:0;0	PA	GPL	MEM	30	1	0		2.84209	3.58145	3.30645	8.82061	6.66975	5.77882	4.90654	4.73538	4.68536
PA 14:1;0-16:1;0	PA	GPL	MEM	30	2	0		2.46783	3.57511	3.4579	4.82046	6.4412	4.66325	2.98967	3.04616	3.12983
PA 14:1;0-18:0;0	PA	GPL	MEM	32	1	0		NA	NA	0.472579	NA	NA	0.438736	0.367625	NA	NA
PA 14:1;0-18:1;0	PA	GPL	MEM	32	2	0		0.409477	0.700254	0.704151	1.04251	1.0433	0.912915	0.408631	0.346129	0.289497
PA 15:0;0-16:1;0	PA	GPL	MEM	31	1	0		2.52888	3.12225	2.69846	7.03505	5.06127	4.50915	5.54572	5.50797	4.95591
PA 15:0;0-18:1;0	PA	GPL	MEM	33	1	0		0.913022	0.822541	0.951643	1.67115	1.66727	1.34428	1.3574	1.37774	1.30665
PA 15:1;0-16:0;0	PA	GPL	MEM	31	1	0		0.75157	0.980699	NA	NA	1.73246	1.62215	1.78677	1.63829	1.37477
PA 15:1;0-16:1;0	PA	GPL	MEM	31	2	0		0.400237	0.477508	0.43983	1.01982	1.29869	0.762372	1.21855	1.15362	1.0955
PA 15:1;0-18:1;0	PA	GPL	MEM	33	2	0		0.0766782	0.0530132	NA	NA	0.208921	0.0783692	0.152788	NA	NA
PA 16:0;0-16:0;0	PA	GPL	MEM	32	0	0		NA	NA	NA	NA	NA	NA	NA	NA	NA
PA 16:0;0-16:1;0	PA	GPL	MEM	32	1	0		107.829	114.055	117.266	130.822	120.668	104.944	122.486	133.983	122.905
PA 16:0;0-17:1;0	PA	GPL	MEM	33	1	0		0.431664	0.364887	0.387779	NA	0.637511	NA	0.623595	0.796688	0.688835
PA 16:0;0-18:1;0	PA	GPL	MEM	34	1	0		121.282	119.077	123.852	94.8087	84.7638	81.5775	59.9968	65.6346	58.2389
PA 16:0;0-18:2;0	PA	GPL	MEM	34	2	0		2.12155	1.93377	2.07396	NA	1.96816	NA	1.87144	2.05824	2.52969
PA 16:1;0-16:1;0	PA	GPL	MEM	32	2	0		140.193	153.103	151.049	183.088	167.495	151.469	141.208	145.407	127.911
PA 16:1;0-17:0;0	PA	GPL	MEM	33	1	0		0.449515	0.433572	0.522406	0.878845	0.74063	0.689235	0.609517	0.57215	0.525093
PA 16:1;0-17:1;0	PA	GPL	MEM	33	2	0		0.370545	0.257575	0.427577	0.683996	0.54913	0.504498	0.736771	0.827667	0.800426
PA 16:1;0-18:0;0	PA	GPL	MEM	34	1	0		8.21351	7.99535	8.14584	10.8975	7.05567	7.58575	4.99366	4.96062	4.59584
PA 16:1;0-18:1;0	PA	GPL	MEM	34	2	0		135.005	128.602	133.403	158.995	134.225	145.008	82.8462	84.4094	69.0394
PA 16:1;0-18:2;0	PA	GPL	MEM	34	3	0		0.914159	1.1488	1.15747	NA	1.03244	0.849743	0.875988	0.724074	0.883686
PA 16:1;0-20:1;0	PA	GPL	MEM	36	2	0		0.573332	0.633109	NA	NA	NA	NA	0.252551	NA	NA
PA 17:0;0-18:1;0	PA	GPL	MEM	35	1	0		0.289841	0.320297	NA	NA	NA	NA	NA	NA	NA
PA 17:1;0-17:1;0	PA	GPL	MEM	34	2	0		NA	NA	NA	0.611379	NA	NA	NA	NA	0.11987
PA 18:0;0-18:0;0	PA	GPL	MEM	36	0	0		NA	NA	NA	0.129476	NA	NA	NA	NA	NA
PA 18:0;0-18:1;0	PA	GPL	MEM	36	1	0		1.16443	1.15233	1.38498	0.924945	0.710502	0.752445	0.447435	0.536045	NA
PA 18:0;0-18:2;0	PA	GPL	MEM	36	2	0		NA	NA	NA	NA	NA	NA	NA	NA	NA
PA 18:1;0-18:1;0	PA	GPL	MEM	36	2	0		1.96185	1.82144	2.60634	2.14598	2.0952	2.56073	0.805448	1.05459	0.952707
PC 10:0;0-14:0;0	PC	GPL	MEM	24	0	0		NA	NA	NA	NA	NA	NA	NA	NA	NA
PC 10:0;0-15:0;0	PC	GPL	MEM	25	0	0		NA	NA	NA	NA	NA	NA	1.20665	NA	NA
PC 10:0;0-16:0;0	PC	GPL	MEM	26	0	0		NA	4.68997	NA	NA	NA	NA	NA	NA	NA
PC 10:0;0-16:1;0	PC	GPL	MEM	26	1	0		NA	NA	NA	NA	NA	NA	NA	NA	NA
PC 10:0;0-18:0;0	PC	GPL	MEM	28	0	0		NA	0.362122	0.256961	NA	NA	NA	NA	NA	NA
PC 10:0;0-18:1;0	PC	GPL	MEM	28	1	0		0.710989	NA	NA	NA	0.751716	NA	NA	NA	NA
PC 11:0;0-16:1;0	PC	GPL	MEM	27	1	0		NA	NA	NA	NA	NA	NA	NA	NA	NA
PC 12:0;0-12:0;0	PC	GPL	MEM	24	0	0		NA	NA	NA	NA	NA	1.20422	2.77153	NA	2.88093
PC 12:0;0-14:0;0	PC	GPL	MEM	26	0	0		4.39456	1.38416	5.77842	5.5609	4.82043	5.47143	17.7394	18.8582	19.4793
PC 12:0;0-14:1;0	PC	GPL	MEM	26	1	0		NA	NA	NA	NA	NA	6.21413	7.2978	7.51299	6.99908
PC 12:0;0-15:0;0	PC	GPL	MEM	27	0	0		NA	NA	NA	NA	NA	NA	2.3981	2.28316	2.78894
PC 12:0;0-15:1;0	PC	GPL	MEM	27	1	0		NA	NA	NA	NA	NA	NA	NA	NA	2.99308
PC 12:0;0-16:0;0	PC	GPL	MEM	28	0	0		8.70036	9.67281	9.8258	11.6929	10.2044	10.5183	23.8099	25.5724	27.9813
PC 12:0;0-16:1;0	PC	GPL	MEM	28	1	0		40.0311	42.7849	46.2937	49.0931	42.1146	59.1152	42.628	44.5753	47.4234
PC 12:0;0-17:0;0	PC	GPL	MEM	29	0	0		NA	NA	NA	NA	NA	NA	0.27286	NA	NA
PC 12:0;0-17:1;0	PC	GPL	MEM	29	1	0		0.230699	4.78962	4.62355	0.22238	0.171753	0.266121	0.425807	1.14358	NA
PC 12:0;0-18:0;0	PC	GPL	MEM	30	0	0		0.422036	0.543047	NA	0.514525	0.522565	0.499583	0.568383	0.651457	0.667777
PC 12:1;0-16:0;0	PC	GPL	MEM	28	1	0		NA	NA	NA	NA	NA	NA	NA	NA	1.06137
PC 12:1;0-16:1;0	PC	GPL	MEM	28	2	0		NA	NA	7.49014	7.40015	1.16047	NA	6.37898	NA	NA
PC 13:0;0-16:0;0	PC	GPL	MEM	29	0	0		NA	NA	NA	NA	NA	NA	0.431516	0.48589	0.694534
PC 13:0;0-16:1;0	PC	GPL	MEM	29	1	0		3.58514	NA	NA	3.93824	3.78862	4.68789	2.91728	NA	4.34632
PC 14:0;0-14:0;0	PC	GPL	MEM	28	0	0		0.600685	0.827404	0.731746	2.07205	1.53327	1.72964	1.63268	1.3738	1.63468
PC 14:0;0-14:1;0	PC	GPL	MEM	28	1	0		1.49487	1.59077	1.72064	3.36968	3.04424	4.53073	3.8171	3.55751	4.15434
PC 14:0;0-15:0;0	PC	GPL	MEM	29	0	0		NA	NA	NA	NA	NA	NA	0.329771	0.396044	0.397057
PC 14:0;0-15:1;0	PC	GPL	MEM	29	1	0		NA	NA	NA	1.30487	1.91264	1.49306	1.56862	3.49044	2.00492
PC 14:0;0-16:0;0	PC	GPL	MEM	30	0	0		2.24731	2.44873	2.71432	5.91712	4.08696	4.69405	2.83995	2.81973	2.88869
PC 14:0;0-17:1;0	PC	GPL	MEM	31	1	0		NA	NA	NA	NA	NA	NA	50	NA	NA
PC 14:0;0-18:1;0	PC	GPL	MEM	32	1	0		5.95626	9.14193	7.53369	8.35937	6.87201	7.14779	8.92437	9.58092	10.1489
PC 14:0;0-18:2;0	PC	GPL	MEM	32	2	0		NA	NA	NA	NA	NA	NA	NA	NA	0.259719
PC 14:1;0-14:1;0	PC	GPL	MEM	28	2	0		NA	NA	NA	NA	NA	8.3631	NA	7.81042	10.3926
PC 14:1;0-15:0;0	PC	GPL	MEM	29	1	0		NA	NA	NA	0.804674	NA	0.632138	1.14722	1.83719	1.09561
PC 14:1;0-16:1;0	PC	GPL	MEM	30	2	0		27.9826	30.7061	30.9019	44.2758	32.2484	53.5947	19.049	19.8887	22.8577
PC 14:1;0-18:0;0	PC	GPL	MEM	32	1	0		0.589523	NA	0.749634	1.37852	1.05876	NA	0.931506	NA	1.03675
PC 14:1;0-18:1;0	PC	GPL	MEM	32	2	0		1.96188	2.96724	2.8972	3.92823	3.17507	4.8657	1.61757	1.69214	1.87666
PC 15:0;0-15:0;0	PC	GPL	MEM	30	0	0		NA	NA	NA	NA	0.0410004	NA	NA	NA	NA
PC 15:0;0-16:1;0	PC	GPL	MEM	31	1	0		50	50	50	50	50	50	50	50	50
PC 15:0;0-18:1;0	PC	GPL	MEM	33	1	0		0.97568	1.47933	1.30746	0.90706	0.600296	0.758537	1.70091	1.23298	1.4094
PC 15:1;0-15:1;0	PC	GPL	MEM	30	2	0		NA	NA	NA	0.18339	0.183119	0.177435	0.114066	0.239512	0.280226
PC 15:1;0-16:0;0	PC	GPL	MEM	31	1	0		50	50	50	50	50	50	50	50	50
PC 15:1;0-16:1;0	PC	GPL	MEM	31	2	0		28.4643	34.9375	34.7012	35.4157	33.8595	41.7443	20.9033	22.1386	23.2469
PC 15:1;0-18:0;0	PC	GPL	MEM	33	1	0		NA	NA	NA	0.216448	NA	NA	0.266451	0.212985	0.260907
PC 15:1;0-18:1;0	PC	GPL	MEM	33	2	0		8.19274	NA	10.389	7.87428	7.77009	NA	4.40163	4.48181	5.44741
PC 16:0;0-16:1;0	PC	GPL	MEM	32	1	0		155.358	185.377	187.111	182.282	153.825	152.767	192.995	204.84	200.1
PC 16:0;0-17:1;0	PC	GPL	MEM	33	1	0		0.243536	NA	NA	0.329733	0.182134	0.186916	0.57979	0.535135	0.600179
PC 16:0;0-18:1;0	PC	GPL	MEM	34	1	0		39.8026	46.3056	45.4243	35.3784	29.3693	26.1043	25.796	26.8835	25.6038
PC 16:0;0-18:2;0	PC	GPL	MEM	34	2	0		NA	1.08637	0.789277	NA	0.394474	0.359135	1.15875	0.997568	1.21756
PC 16:0;0-18:3;0	PC	GPL	MEM	34	3	0		NA	NA	NA	NA	NA	NA	NA	NA	NA
PC 16:0;0-20:4;0	PC	GPL	MEM	36	4	0		NA	NA	NA	NA	NA	NA	NA	NA	0.445313
PC 16:1;0-16:1;0	PC	GPL	MEM	32	2	0		574.431	675.616	676.569	652.386	587.667	728.559	346.923	372.922	357.378
PC 16:1;0-16:2;0	PC	GPL	MEM	32	3	0		0.59865	NA	0.791588	0.747671	0.677061	NA	0.466011	NA	NA
PC 16:1;0-17:0;0	PC	GPL	MEM	33	1	0		3.01948	3.80116	4.03055	3.21004	3.19417	2.58884	4.06971	4.09782	4.2913
PC 16:1;0-17:1;0	PC	GPL	MEM	33	2	0		6.79531	18.0116	9.48943	7.47172	8.64221	19.7402	5.31895	7.70541	8.59831
PC 16:1;0-18:0;0	PC	GPL	MEM	34	1	0		NA	NA	NA	NA	NA	NA	15.0264	17.241	16.9795
PC 16:1;0-18:1;0	PC	GPL	MEM	34	2	0		279.513	313.289	317.926	259.506	234.249	278.657	124.568	133.514	128.548
PC 16:1;0-18:2;0	PC	GPL	MEM	34	3	0		3.32458	4.90605	5.16366	3.38843	3.05534	4.60135	2.1873	1.9393	2.30472
PC 16:1;0-18:3;0	PC	GPL	MEM	34	4	0		NA	NA	NA	NA	NA	NA	NA	NA	NA
PC 16:1;0-20:0;0	PC	GPL	MEM	36	1	0		NA	NA	NA	NA	NA	NA	NA	NA	NA
PC 16:1;0-20:1;0	PC	GPL	MEM	36	2	0		2.32202	NA	3.07514	2.2646	2.52711	2.10509	2.09836	1.74036	NA
PC 16:1;0-20:4;0	PC	GPL	MEM	36	5	0		NA	NA	NA	NA	NA	0.663945	NA	NA	NA
PC 16:2;0-18:1;0	PC	GPL	MEM	34	3	0		NA	NA	NA	NA	0.213322	NA	NA	NA	NA
PC 17:0;0-18:1;0	PC	GPL	MEM	35	1	0		0.841212	NA	1.11479	NA	NA	NA	0.830338	0.828789	0.734567
PC 17:1;0-18:0;0	PC	GPL	MEM	35	1	0		NA	NA	NA	NA	NA	NA	NA	NA	NA
PC 17:1;0-18:1;0	PC	GPL	MEM	35	2	0		NA	NA	NA	1.70991	NA	NA	NA	1.60105	1.86509
PC 18:0;0-18:1;0	PC	GPL	MEM	36	1	0		4.34124	5.47074	5.17699	3.10142	2.52704	2.01093	2.62153	3.04392	2.93319
PC 18:0;0-18:2;0	PC	GPL	MEM	36	2	0		NA	NA	NA	NA	NA	NA	NA	NA	NA
PC 18:1;0-18:1;0	PC	GPL	MEM	36	2	0		11.2675	14.4031	11.3578	9.07187	7.58307	8.46868	4.00624	4.42701	6.04034
PC 18:1;0-18:2;0	PC	GPL	MEM	36	3	0		NA	NA	NA	NA	NA	NA	NA	NA	NA
PC 18:1;0-20:1;0	PC	GPL	MEM	38	2	0		NA	NA	NA	NA	NA	NA	NA	NA	NA
PE 10:0;0-16:0;0	PE	GPL	MEM	26	0	0		NA	24.4483	NA	NA	NA	NA	NA	NA	NA
PE 10:0;0-16:1;0	PE	GPL	MEM	26	1	0		NA	2.21877	NA	NA	NA	NA	NA	1.93926	NA
PE 10:0;0-18:0;0	PE	GPL	MEM	28	0	0		NA	0.32088	NA	NA	NA	NA	NA	NA	NA
PE 12:0;0-14:0;0	PE	GPL	MEM	26	0	0		23.4001	4.2172	30.3002	28.5263	33.4693	21.0375	26.2599	31.375	30.405
PE 12:0;0-16:0;0	PE	GPL	MEM	28	0	0		3.3828	3.60856	4.54696	4.90219	4.52342	4.69233	4.53021	4.77769	4.93206
PE 12:0;0-16:1;0	PE	GPL	MEM	28	1	0		7.84755	9.01404	11.258	13.9877	12.1631	16.4257	8.58619	8.41956	8.14209
PE 12:0;0-18:0;0	PE	GPL	MEM	30	0	0		NA	NA	NA	NA	NA	NA	NA	NA	NA
PE 12:0;0-18:1;0	PE	GPL	MEM	30	1	0		1.21671	1.48229	1.91952	2.73799	2.81873	2.51809	0.777554	NA	NA
PE 13:0;0-16:1;0	PE	GPL	MEM	29	1	0		NA	NA	0.745544	NA	NA	NA	NA	NA	NA
PE 14:0;0-14:0;0	PE	GPL	MEM	28	0	0		0.105341	0.0826121	0.178827	0.649777	0.595665	0.552198	0.152297	0.138992	0.206276
PE 14:0;0-14:1;0	PE	GPL	MEM	28	1	0		0.225463	NA	NA	0.754724	0.70437	1.04287	0.448199	0.539144	0.594708
PE 14:0;0-15:1;0	PE	GPL	MEM	29	1	0		NA	NA	NA	0.950383	NA	0.762161	NA	NA	NA
PE 14:0;0-16:0;0	PE	GPL	MEM	30	0	0		NA	NA	NA	1.73735	1.68464	1.4617	0.568474	0.527445	NA
PE 14:0;0-16:1;0	PE	GPL	MEM	30	1	0		14.603	18.3089	19.7566	31.5759	27.2338	30.8652	16.3344	17.3952	17.4472
PE 14:0;0-18:1;0	PE	GPL	MEM	32	1	0		17.0084	21.3397	21.5898	25.3045	22.5182	22.1057	9.9246	9.87904	11.2406
PE 14:1;0-16:0;0	PE	GPL	MEM	30	1	0		1.85303	2.18959	2.35998	3.42216	3.16375	3.70624	2.36381	2.53145	2.63015
PE 14:1;0-16:1;0	PE	GPL	MEM	30	2	0		2.1448	2.34713	2.84648	4.45374	4.56492	5.18213	2.641	2.69101	2.71873
PE 14:1;0-18:0;0	PE	GPL	MEM	32	1	0		0.24631	NA	NA	0.591259	NA	0.282968	NA	NA	NA
PE 14:1;0-18:1;0	PE	GPL	MEM	32	2	0		0.930247	1.57085	1.50594	NA	2.26474	2.73465	0.649943	0.409146	0.707888
PE 15:0;0-16:1;0	PE	GPL	MEM	31	1	0		3.08282	3.92133	4.47238	6.44554	5.75707	4.44877	4.73336	4.54227	4.83614
PE 15:0;0-18:1;0	PE	GPL	MEM	33	1	0		4.18884	7.34012	6.76419	4.14275	6.85206	2.63849	2.05202	1.91542	2.40499
PE 15:1;0-16:0;0	PE	GPL	MEM	31	1	0		1.48965	1.31338	1.53272	2.13881	1.30645	2.11829	1.77183	2.1333	2.4806
PE 15:1;0-16:1;0	PE	GPL	MEM	31	2	0		0.827914	1.08558	1.19467	2.3638	2.52352	1.61678	1.74317	2.09107	1.72076
PE 15:1;0-18:1;0	PE	GPL	MEM	33	2	0		NA	1.01322	NA	1.25889	1.48492	2.13804	0.629	1.07272	0.658865
PE 16:0;0-16:1;0	PE	GPL	MEM	32	1	0		122.842	163.268	165.021	142.876	124.39	116.686	117.329	127.865	129.096
PE 16:0;0-17:1;0	PE	GPL	MEM	33	1	0		2.42397	5.14735	4.51362	2.09881	3.53899	1.21421	1.03852	1.35102	1.09613
PE 16:0;0-18:1;0	PE	GPL	MEM	34	1	0		149.797	201.285	201.924	128.736	118.093	95.1992	74.748	83.5929	82.3254
PE 16:0;0-18:2;0	PE	GPL	MEM	34	2	0		1.61068	3.32577	3.10691	1.78018	1.88037	1.39922	2.17478	1.72635	2.09295
PE 16:0;0-18:3;0	PE	GPL	MEM	34	3	0		NA	NA	NA	NA	NA	NA	NA	NA	NA
PE 16:1;0-16:1;0	PE	GPL	MEM	32	2	0		198.157	241.716	252.516	278.352	245.183	282.181	204.463	212.877	203.978
PE 16:1;0-17:0;0	PE	GPL	MEM	33	1	0		NA	NA	NA	4.08753	NA	2.48392	1.54456	1.44476	1.45145
PE 16:1;0-17:1;0	PE	GPL	MEM	33	2	0		10.612	21.7735	21.2981	18.9433	24.825	12.0597	5.42429	7.78084	5.16491
PE 16:1;0-18:1;0	PE	GPL	MEM	34	2	0		348.207	436.986	450.914	421.216	399.264	397.678	180.562	183.983	176.129
PE 16:1;0-18:2;0	PE	GPL	MEM	34	3	0		2.57385	4.24942	4.66774	3.13587	3.08594	3.03149	1.95665	1.67496	1.96882
PE 16:1;0-20:1;0	PE	GPL	MEM	36	2	0		6.98139	NA	12.1297	14.8001	NA	NA	2.02053	1.91319	NA
PE 17:0;0-18:1;0	PE	GPL	MEM	35	1	0		2.97531	6.60481	5.94352	3.33487	NA	NA	0.936435	0.922062	NA
PE 17:1;0-17:1;0	PE	GPL	MEM	34	2	0		NA	NA	NA	0.141197	NA	NA	NA	NA	NA
PE 17:1;0-18:1;0	PE	GPL	MEM	35	2	0		NA	NA	NA	20.4424	26.7319	14.7418	3.44718	NA	2.95138
PE 17:1;0-18:2;0	PE	GPL	MEM	35	3	0		NA	NA	1.56858	NA	2.15201	1.269	NA	NA	NA
PE 18:0;0-18:1;0	PE	GPL	MEM	36	1	0		6.01118	NA	9.17857	NA	NA	NA	2.33369	2.46792	2.60493
PE 18:0;0-18:2;0	PE	GPL	MEM	36	2	0		0.17615	0.40743	0.313196	NA	0.805827	NA	NA	NA	NA
PE 18:1;0-18:1;0	PE	GPL	MEM	36	2	0		25.65	54.6978	41.6569	44.9121	67.9505	42.8796	6.12249	5.6138	7.07944
PE 18:1;0-18:2;0	PE	GPL	MEM	36	3	0		0.457516	1.28091	0.905888	NA	NA	0.655796	NA	NA	NA
PE 18:1;0-20:1;0	PE	GPL	MEM	38	2	0		NA	NA	NA	NA	NA	NA	NA	NA	NA
PE 19:1;0-19:1;0	PE	GPL	MEM	38	2	0		NA	NA	NA	NA	1.82295	NA	NA	NA	NA
PG 16:0;0-16:1;0	PG	GPL	MEM	32	1	0		0.398426	NA	NA	NA	NA	0.367761	NA	NA	NA
PG 16:0;0-18:1;0	PG	GPL	MEM	34	1	0		NA	NA	NA	NA	NA	NA	NA	NA	NA
PG 16:1;0-18:0;0	PG	GPL	MEM	34	1	0		NA	NA	NA	NA	NA	NA	NA	NA	NA
PI 10:0;0-12:0;0	PI	GPL	MEM	22	0	0		NA	NA	NA	NA	NA	NA	0.705528	NA	NA
PI 10:0;0-14:0;0	PI	GPL	MEM	24	0	0		6.51006	10.054	10.209	14.6354	12.0567	11.9811	27.5622	23.3808	31.982
PI 10:0;0-15:0;0	PI	GPL	MEM	25	0	0		NA	NA	NA	2.0655	1.88754	NA	5.08897	4.36477	5.83669
PI 10:0;0-16:0;0	PI	GPL	MEM	26	0	0		125.805	180.031	188.471	243.633	165.97	153.976	336.893	322.752	NA
PI 10:0;0-16:1;0	PI	GPL	MEM	26	1	0		6.56689	8.4701	10.0152	8.65559	9.98256	7.93339	7.25473	8.19907	NA
PI 10:0;0-17:0;0	PI	GPL	MEM	27	0	0		0.405512	0.41664	NA	0.449029	0.705084	NA	4.28903	2.69446	NA
PI 10:0;0-18:0;0	PI	GPL	MEM	28	0	0		24.7145	32.8221	39.3624	50.4951	30.9566	28.3604	61.3129	63.0884	73.1651
PI 10:0;0-18:1;0	PI	GPL	MEM	28	1	0		NA	NA	1.42525	2.56774	1.403	1.38414	1.2328	1.23126	NA
PI 10:0;0-20:0;0	PI	GPL	MEM	30	0	0		NA	NA	NA	NA	NA	NA	0.141609	NA	0.228661
PI 10:1;0-16:0;0	PI	GPL	MEM	26	1	0		NA	1.38834	NA	4.57446	NA	0.899996	1.59209	NA	NA
PI 10:1;0-18:0;0	PI	GPL	MEM	28	1	0		NA	NA	NA	NA	NA	NA	0.478065	NA	NA
PI 11:0;0-16:0;0	PI	GPL	MEM	27	0	0		1.94359	1.49691	2.13135	4.21586	2.55587	1.65773	NA	2.76837	NA
PI 11:0;0-18:0;0	PI	GPL	MEM	29	0	0		0.508142	NA	NA	NA	NA	NA	1.156	NA	1.52225
PI 12:0;0-12:0;0	PI	GPL	MEM	24	0	0		0.177676	0.210431	0.137529	1.39418	0.356317	0.174984	0.987395	0.930536	1.14684
PI 12:0;0-14:0;0	PI	GPL	MEM	26	0	0		10.2793	14.0577	14.2773	32.5845	22.4793	22.6475	39.6071	37.4629	434.837
PI 12:0;0-14:1;0	PI	GPL	MEM	26	1	0		NA	0.156337	NA	NA	0.278564	0.19237	0.258546	0.197526	10.8171
PI 12:0;0-15:0;0	PI	GPL	MEM	27	0	0		0.647014	0.819132	0.978844	1.25719	1.72844	1.38602	6.97396	4.4379	13.39
PI 12:0;0-15:1;0	PI	GPL	MEM	27	1	0		NA	NA	NA	NA	NA	NA	0.363345	NA	NA
PI 12:0;0-16:0;0	PI	GPL	MEM	28	0	0		129.873	167.577	184.572	268.732	200.22	192.182	296.159	290.363	364.169
PI 12:0;0-16:1;0	PI	GPL	MEM	28	1	0		11.6146	16.0213	15.5345	20.003	18.4953	16.9762	17.563	17.6418	23.9837
PI 12:0;0-17:0;0	PI	GPL	MEM	29	0	0		0.254862	0.552422	0.627597	1.08732	0.67074	NA	1.8141	1.98852	2.01295
PI 12:0;0-17:1;0	PI	GPL	MEM	29	1	0		NA	NA	NA	NA	NA	NA	NA	NA	0.189615
PI 12:0;0-18:0;0	PI	GPL	MEM	30	0	0		15.3606	17.3949	21.9522	33.945	25.4078	24.1844	31.8112	32.7514	41.0292
PI 12:0;0-18:1;0	PI	GPL	MEM	30	1	0		1.8708	2.55817	2.39832	6.26578	2.82602	2.70969	2.29338	2.68348	3.07878
PI 12:0;0-18:2;0	PI	GPL	MEM	30	2	0		NA	NA	NA	0.47186	NA	NA	NA	NA	NA
PI 12:1;0-14:0;0	PI	GPL	MEM	26	1	0		NA	0.144662	NA	NA	NA	NA	NA	NA	NA
PI 12:1;0-16:0;0	PI	GPL	MEM	28	1	0		1.2443	2.18957	2.10089	5.13955	1.64522	1.21162	2.12899	1.76124	2.9418
PI 12:1;0-18:0;0	PI	GPL	MEM	30	1	0		0.317783	0.284234	0.612499	NA	NA	NA	0.607204	NA	0.688937
PI 13:0;0-16:0;0	PI	GPL	MEM	29	0	0		0.601113	1.12038	1.1497	NA	1.50103	1.27484	1.61899	1.70964	2.03654
PI 13:0;0-16:1;0	PI	GPL	MEM	29	1	0		NA	NA	NA	NA	NA	NA	0.768091	NA	NA
PI 14:0;0-14:0;0	PI	GPL	MEM	28	0	0		3.26027	4.20796	4.06858	14.5381	11.3505	11.0846	7.26931	6.41205	8.60383
PI 14:0;0-14:1;0	PI	GPL	MEM	28	1	0		1.21417	1.86373	1.85649	4.73896	4.34861	4.52581	3.74204	3.58712	4.74703
PI 14:0;0-15:0;0	PI	GPL	MEM	29	0	0		0.14958	0.224658	0.309764	1.55199	0.743438	0.598836	0.598043	0.665269	0.619855
PI 14:0;0-15:1;0	PI	GPL	MEM	29	1	0		NA	NA	NA	0.891901	0.706364	0.453756	0.433681	0.732281	0.77364
PI 14:0;0-16:0;0	PI	GPL	MEM	30	0	0		18.9246	20.9448	25.2239	66.4039	56.3417	51.2899	22.657	22.2157	25.7471
PI 14:0;0-16:1;0	PI	GPL	MEM	30	1	0		38.4521	51.4907	54.1041	90.5585	71.0898	69.4385	57.6476	54.8226	67.0102
PI 14:0;0-17:0;0	PI	GPL	MEM	31	0	0		NA	NA	NA	NA	0.316645	NA	NA	NA	0.261174
PI 14:0;0-17:1;0	PI	GPL	MEM	31	1	0		NA	0.48058	NA	3.32412	0.776113	0.620115	0.720422	0.312874	0.395356
PI 14:0;0-18:0;0	PI	GPL	MEM	32	0	0		NA	NA	NA	NA	NA	NA	NA	NA	NA
PI 14:0;0-18:1;0	PI	GPL	MEM	32	1	0		32.8341	40.6156	42.506	59.8408	45.9313	44.5078	25.5874	25.7758	30.1565
PI 14:0;0-18:2;0	PI	GPL	MEM	32	2	0		NA	0.171226	NA	2.35531	NA	NA	0.210636	0.255642	0.294385
PI 14:1;0-15:0;0	PI	GPL	MEM	29	1	0		NA	NA	NA	0.429765	0.55872	0.320659	0.561087	0.771053	1.1269
PI 14:1;0-16:0;0	PI	GPL	MEM	30	1	0		18.2965	24.9321	25.0753	61.8002	43.5464	44.1514	37.0744	36.4043	45.8565
PI 14:1;0-16:1;0	PI	GPL	MEM	30	2	0		1.61783	2.54144	2.69793	4.07	3.94923	3.50338	2.61924	2.62549	3.16971
PI 14:1;0-18:0;0	PI	GPL	MEM	32	1	0		3.20225	4.21427	4.88486	14.394	7.13145	7.37118	6.21185	6.12844	7.64058
PI 14:1;0-18:1;0	PI	GPL	MEM	32	2	0		0.439409	0.766658	0.613129	2.20564	0.794478	0.881629	0.569047	0.648988	0.683157
PI 15:0;0-15:0;0	PI	GPL	MEM	30	0	0		NA	NA	NA	2.02233	NA	NA	0.0907513	NA	0.146592
PI 15:0;0-15:1;0	PI	GPL	MEM	30	1	0		NA	NA	NA	NA	NA	NA	NA	0.162449	NA
PI 15:0;0-16:0;0	PI	GPL	MEM	31	0	0		NA	NA	0.553459	NA	0.465452	NA	0.500796	0.426179	0.439721
PI 15:0;0-16:1;0	PI	GPL	MEM	31	1	0		4.63662	5.73912	6.64572	12.4043	10.7764	8.19537	12.2897	11.4483	12.9012
PI 15:0;0-18:1;0	PI	GPL	MEM	33	1	0		2.02428	2.67282	3.14912	3.06893	3.5527	2.85147	3.61271	3.61207	3.57508
PI 15:1;0-16:0;0	PI	GPL	MEM	31	1	0		2.72096	3.12171	3.3386	15.3292	7.12994	5.49463	7.45092	7.46593	8.23787
PI 15:1;0-16:1;0	PI	GPL	MEM	31	2	0		NA	NA	NA	0.765683	0.782062	0.554534	0.713567	0.704059	0.847221
PI 15:1;0-18:0;0	PI	GPL	MEM	33	1	0		0.365336	0.503551	NA	1.42433	1.19642	0.899912	1.16629	1.16883	1.29796
PI 15:1;0-18:1;0	PI	GPL	MEM	33	2	0		NA	NA	NA	NA	NA	NA	0.11202	NA	NA
PI 16:0;0-16:0;0	PI	GPL	MEM	32	0	0		NA	NA	NA	NA	NA	NA	NA	NA	NA
PI 16:0;0-16:1;0	PI	GPL	MEM	32	1	0		482.62	598.887	673.991	778.74	581.047	552.97	538.817	550.029	603.669
PI 16:0;0-16:2;0	PI	GPL	MEM	32	2	0		NA	NA	NA	NA	NA	0.657001	0.776261	0.907444	NA
PI 16:0;0-17:1;0	PI	GPL	MEM	33	1	0		1.89233	2.23972	3.07867	5.41414	3.73703	2.40989	3.1188	3.51374	4.33803
PI 16:0;0-18:1;0	PI	GPL	MEM	34	1	0		423.581	488.231	601.379	502.835	373.189	360.83	257.256	265.371	289.227
PI 16:0;0-18:2;0	PI	GPL	MEM	34	2	0		1.70894	2.44407	2.61008	4.67497	1.72364	1.76492	2.13978	2.17075	2.78739
PI 16:0;0-18:3;0	PI	GPL	MEM	34	3	0		NA	NA	0.242128	NA	NA	NA	0.167607	NA	NA
PI 16:0;0-20:1;0	PI	GPL	MEM	36	1	0		0.481511	0.533221	0.84541	5.76105	0.498399	0.654952	0.40228	0.583734	NA
PI 16:1;0-16:1;0	PI	GPL	MEM	32	2	0		52.8384	69.381	80.9968	79.2463	59.1828	57.6003	54.7566	56.3216	69.1967
PI 16:1;0-17:0;0	PI	GPL	MEM	33	1	0		1.4335	1.72524	2.27908	1.72104	2.10765	1.81697	3.36317	3.37218	4.02572
PI 16:1;0-17:1;0	PI	GPL	MEM	33	2	0		NA	NA	NA	NA	NA	0.370846	0.413378	0.573988	0.666851
PI 16:1;0-18:0;0	PI	GPL	MEM	34	1	0		83.1177	97.346	116.777	140.058	98.3015	89.9514	89.4684	97.926	106.443
PI 16:1;0-18:1;0	PI	GPL	MEM	34	2	0		44.9883	54.0086	65.3244	53.2225	43.5386	43.3356	30.459	32.279	35.9834
PI 16:1;0-18:2;0	PI	GPL	MEM	34	3	0		NA	0.462813	0.42433	NA	NA	NA	0.431157	0.577916	0.873524
PI 16:1;0-18:3;0	PI	GPL	MEM	34	4	0		NA	NA	NA	NA	NA	NA	NA	NA	NA
PI 16:1;0-19:0;0	PI	GPL	MEM	35	1	0		NA	0.369589	NA	NA	NA	NA	NA	NA	NA
PI 16:1;0-20:0;0	PI	GPL	MEM	36	1	0		0.741988	0.664057	NA	1.27199	0.487378	0.743401	0.623198	0.656096	0.782099
PI 16:1;0-20:1;0	PI	GPL	MEM	36	2	0		NA	NA	NA	NA	NA	NA	0.303891	NA	NA
PI 16:1;0-26:0;0	PI	GPL	MEM	42	1	0		NA	NA	NA	NA	NA	NA	NA	NA	NA
PI 16:2;0-18:0;0	PI	GPL	MEM	34	2	0		NA	NA	NA	NA	NA	NA	NA	NA	NA
PI 17:0;0-18:1;0	PI	GPL	MEM	35	1	0		1.63593	0.856265	1.4194	0.722137	0.711996	0.667601	1.18194	1.02243	1.15841
PI 17:0;0-19:5;0	PI	GPL	MEM	36	5	0		NA	NA	NA	NA	NA	NA	NA	NA	NA
PI 17:1;0-17:1;0	PI	GPL	MEM	34	2	0		NA	NA	NA	NA	NA	NA	NA	NA	NA
PI 17:1;0-18:0;0	PI	GPL	MEM	35	1	0		NA	0.820349	1.38012	1.25393	1.37036	0.869011	1.18847	1.17187	1.38743
PI 18:0;0-18:1;0	PI	GPL	MEM	36	1	0		56.444	61.7362	85.0989	53.9793	46.0701	42.1938	32.1229	35.0803	38.191
PI 18:0;0-18:2;0	PI	GPL	MEM	36	2	0		0.318704	0.496595	0.528828	0.710991	0.322462	0.313085	0.26525	0.382775	0.548657
PI 18:1;0-18:1;0	PI	GPL	MEM	36	2	0		2.16719	2.41359	3.28674	2.45745	2.54362	2.32389	1.05377	1.31688	1.5008
PI 18:1;0-18:2;0	PI	GPL	MEM	36	3	0		NA	NA	NA	NA	NA	NA	NA	NA	NA
PI 18:1;0-24:0;0	PI	GPL	MEM	42	1	0		NA	NA	NA	NA	NA	NA	NA	NA	NA
PS 10:0;0-16:0;0	PS	GPL	MEM	26	0	0		NA	NA	NA	1.53938	1.31613	NA	2.51678	2.85505	NA
PS 10:0;0-16:1;0	PS	GPL	MEM	26	1	0		NA	NA	NA	NA	0.462339	NA	0.417693	0.612113	NA
PS 12:0;0-14:0;0	PS	GPL	MEM	26	0	0		NA	1.66382	NA	0.266117	0.17616	NA	0.175354	0.174463	NA
PS 12:0;0-16:0;0	PS	GPL	MEM	28	0	0		1.99069	2.59702	2.95499	2.1666	2.55862	2.07576	3.36484	3.34433	3.777
PS 12:0;0-16:1;0	PS	GPL	MEM	28	1	0		1.34463	2.04042	2.32484	2.4161	2.94318	2.6559	3.62705	3.95343	4.40926
PS 12:0;0-18:1;0	PS	GPL	MEM	30	1	0		NA	NA	NA	0.549473	NA	NA	NA	NA	NA
PS 14:0;0-14:0;0	PS	GPL	MEM	28	0	0		NA	NA	NA	0.463116	0.130799	0.065415	0.0581028	0.0685279	NA
PS 14:0;0-14:1;0	PS	GPL	MEM	28	1	0		0.0746809	NA	NA	0.560452	0.228548	0.137791	0.122638	NA	NA
PS 14:0;0-16:1;0	PS	GPL	MEM	30	1	0		3.12132	3.9723	4.68681	5.40307	6.8623	5.73887	4.28032	4.5988	5.13138
PS 14:0;0-18:1;0	PS	GPL	MEM	32	1	0		7.78275	9.82244	11.1084	12.584	9.83017	9.0415	4.57242	4.56807	4.94931
PS 14:0;0-18:2;0	PS	GPL	MEM	32	2	0		NA	NA	NA	14.3932	NA	NA	NA	NA	NA
PS 14:1;0-16:0;0	PS	GPL	MEM	30	1	0		0.68143	1.00878	0.889299	1.31334	1.14929	1.21152	1.03582	0.884595	1.10878
PS 14:1;0-18:1;0	PS	GPL	MEM	32	2	0		NA	0.612128	NA	NA	0.55418	0.529377	0.152797	NA	NA
PS 15:0;0-16:1;0	PS	GPL	MEM	31	1	0		1.16448	1.53742	1.78069	3.59543	1.87371	1.66376	2.33692	2.51898	2.57813
PS 15:0;0-18:1;0	PS	GPL	MEM	33	1	0		0.587328	0.772309	0.921687	0.997486	1.67272	0.843446	0.757413	0.833766	1.8846
PS 15:1;0-16:0;0	PS	GPL	MEM	31	1	0		NA	NA	NA	NA	0.743538	0.658056	0.511149	NA	0.858865
PS 16:0;0-16:1;0	PS	GPL	MEM	32	1	0		51.2515	75.5772	78.864	58.532	54.8651	46.2967	55.6202	60.6808	63.4588
PS 16:0;0-17:1;0	PS	GPL	MEM	33	1	0		0.251656	0.339991	0.508728	0.538301	0.454394	0.338206	0.324662	0.464956	NA
PS 16:0;0-18:1;0	PS	GPL	MEM	34	1	0		83.7994	112.071	128.495	57.7049	55.0322	47.1067	33.1232	36.5034	37.6885
PS 16:0;0-18:2;0	PS	GPL	MEM	34	2	0		NA	NA	1.10927	13.7008	NA	NA	NA	NA	NA
PS 16:1;0-16:1;0	PS	GPL	MEM	32	2	0		17.9562	24.0616	26.6389	29.0696	39.4721	38.4213	37.909	35.8878	36.9442
PS 16:1;0-17:0;0	PS	GPL	MEM	33	1	0		0.365959	0.444001	0.401051	0.357947	NA	0.375796	0.345071	0.414612	NA
PS 16:1;0-18:0;0	PS	GPL	MEM	34	1	0		NA	NA	NA	4.5219	NA	NA	NA	NA	NA
PS 16:1;0-18:1;0	PS	GPL	MEM	34	2	0		48.9205	63.8393	71.0749	65.8685	70.3712	70.936	35.7869	36.51	35.136
PS 17:0;0-18:0;0	PS	GPL	MEM	35	0	0		NA	NA	NA	NA	NA	0.660745	0.626389	NA	NA
PS 17:0;0-18:1;0	PS	GPL	MEM	35	1	0		0.944919	1.26925	1.55778	1.24738	NA	NA	NA	NA	NA
PS 17:1;0-17:1;0	PS	GPL	MEM	34	2	0		0.0747031	0.0667321	0.0843289	0.272273	0.105122	0.0678321	0.0542125	NA	NA
PS 18:0;0-18:1;0	PS	GPL	MEM	36	1	0		0.62829	1.02751	1.05401	NA	0.73528	0.734165	NA	NA	NA
PS 18:1;0-18:1;0	PS	GPL	MEM	36	2	0		NA	NA	NA	NA	NA	0.413592	NA	NA	NA
TAG 40:0;0	TAG	GL	STO	40	0	0		1.74131	NA	NA	8.58624	7.50441	7.22245	5.7054	5.80637	5.91117
TAG 40:1;0	TAG	GL	STO	40	1	0		NA	2.62065	2.08988	5.7861	6.721	7.20721	4.77314	5.14517	6.29557
TAG 42:0;0	TAG	GL	STO	42	0	0		7.07469	11.6327	9.09927	22.7378	22.1005	21.0751	16.3544	17.2027	17.0448
TAG 42:1;0	TAG	GL	STO	42	1	0		10.9987	NA	12.2409	26.8884	26.1814	24.74	20.3237	22.7307	25.7366
TAG 42:2;0	TAG	GL	STO	42	2	0		2.14503	3.0306	3.68955	6.83728	7.37683	6.2782	3.41039	4.46338	4.88395
TAG 44:0;0	TAG	GL	STO	44	0	0		7.60678	8.9883	9.39885	21.3317	21.0125	19.8087	16.8883	16.7527	17.8624
TAG 44:1;0	TAG	GL	STO	44	1	0		12.5668	14.2555	16.5111	34.3628	33.686	33.4806	25.576	28.5297	33.2583
TAG 44:2;0	TAG	GL	STO	44	2	0		5.41664	NA	NA	12.6857	12.3757	12.0453	NA	10.3133	12.1332
TAG 46:0;0	TAG	GL	STO	46	0	0		3.98968	3.93714	4.25927	9.57815	9.09481	8.85249	5.31946	5.37242	5.88147
TAG 46:1;0	TAG	GL	STO	46	1	0		12.5435	13.8661	13.9969	38.3751	38.7853	36.7201	20.4873	19.5278	22.1044
TAG 46:2;0	TAG	GL	STO	46	2	0		11.2369	11.9329	13.124	32.4593	31.1706	29.7079	20.0161	22.9593	25.7623
TAG 46:3;0	TAG	GL	STO	46	3	0		NA	NA	NA	3.81713	3.47593	2.5893	2.88785	3.03792	4.30876
TAG 47:1;0	TAG	GL	STO	47	1	0		NA	NA	NA	4.28655	3.56403	2.41	2.19876	NA	NA
TAG 47:2;0	TAG	GL	STO	47	2	0		NA	NA	NA	3.30157	3.67624	2.14382	3.00176	3.21227	NA
TAG 48:0;0	TAG	GL	STO	48	0	0		NA	NA	NA	4.73719	4.24267	2.56543	NA	NA	NA
TAG 48:1;0	TAG	GL	STO	48	1	0		23.7252	25.1741	25.767	56.1415	52.7188	48.9755	28.7046	30.5743	31.6434
TAG 48:2;0	TAG	GL	STO	48	2	0		39.99	41.0881	47.0068	90.2933	88.5262	75.5382	53.8661	59.7058	68.7871
TAG 48:3;0	TAG	GL	STO	48	3	0		22.1689	25.0059	26.5541	41.8396	39.646	33.3186	35.9315	39.5078	44.3266
TAG 49:1;0	TAG	GL	STO	49	1	0		NA	NA	NA	NA	NA	NA	NA	NA	NA
TAG 49:2;0	TAG	GL	STO	49	2	0		NA	NA	NA	3.58265	3.75082	2.29595	2.63304	3.13446	3.08674
TAG 50:0;0	TAG	GL	STO	50	0	0		NA	NA	NA	NA	2.67715	NA	NA	NA	NA
TAG 50:1;0	TAG	GL	STO	50	1	0		17.4545	20.1407	19.7707	30.9853	28.5775	23.7593	15.807	15.7996	16.8694
TAG 50:2;0	TAG	GL	STO	50	2	0		40.8246	41.9178	46.8299	65.6213	62.3366	50.1109	35.7873	41.0627	43.9195
TAG 50:3;0	TAG	GL	STO	50	3	0		32.7769	34.9389	37.4115	42.3507	43.6226	34.4477	31.8547	34.8717	39.0555
TAG 50:4;0	TAG	GL	STO	50	4	0		NA	NA	NA	NA	NA	NA	NA	NA	NA
TAG 51:2;0	TAG	GL	STO	51	2	0		NA	NA	NA	NA	NA	NA	NA	NA	NA
TAG 52:0;0	TAG	GL	STO	52	0	0		NA	NA	NA	NA	NA	NA	NA	NA	NA
TAG 52:1;0	TAG	GL	STO	52	1	0		7.21037	NA	NA	9.25532	8.15243	NA	4.67261	4.63289	NA
TAG 52:2;0	TAG	GL	STO	52	2	0		16.4107	18.7797	18.3935	19.7845	17.3651	13.7886	10.49	11.1679	13.0438
TAG 52:3;0	TAG	GL	STO	52	3	0		12.5939	13.0188	14.0025	13.2845	13.3333	10.0166	8.68209	8.79877	10.6248
TAG 54:0;0	TAG	GL	STO	54	0	0		NA	NA	NA	NA	NA	NA	NA	NA	NA
TAG 54:1;0	TAG	GL	STO	54	1	0		NA	2.82709	2.18513	2.39007	2.60721	NA	NA	NA	NA
TAG 54:2;0	TAG	GL	STO	54	2	0		5.7068	14.6045	5.71229	4.32942	NA	3.85322	4.02893	3.09561	3.16429
TAG 54:3;0	TAG	GL	STO	54	3	0		2.67297	8.25821	NA	NA	NA	NA	2.0966	NA	NA
TAG 56:1;0	TAG	GL	STO	56	1	0		3.83563	6.59739	3.32027	3.10271	NA	2.44198	NA	NA	NA
TAG 56:2;0	TAG	GL	STO	56	2	0		NA	NA	NA	NA	NA	NA	NA	NA	NA
TAG 58:1;0	TAG	GL	STO	58	1	0		4.25815	3.97899	NA	NA	NA	2.07173	NA	NA	NA
TAG 58:2;0	TAG	GL	STO	58	2	0		NA	NA	NA	NA	NA	NA	NA	NA	NA
TAG 60:1;0	TAG	GL	STO	60	1	0		NA	NA	NA	NA	NA	NA	NA	NA	NA
TAG 60:2;0	TAG	GL	STO	60	2	0		NA	NA	NA	NA	NA	NA	NA	NA	NA

## Sheet: Chain Length (plotted)
	Average lipid chain length n=3
	WT-1	WT-2	WT-3	eaf1D-1	eaf1D-2	eaf1D-3	WT-SorA-1	WT-SorA-2	WT-SorA-3
PA	16.3509	16.29	16.3249	16.192	16.1002	16.1881	16.0544	16.0651	16.0324
PC	16.1157	16.1186	16.1074	16.0328	16.0447	15.9994	15.8334	15.8736	15.827
PE	16.4974	16.5134	16.5146	16.4492	16.4737	16.4201	16.2314	16.1983	16.2057
PI	15.875	15.7911	15.8652	15.6005	15.6243	15.6324	15.168	15.2179	15.1472
PS	16.5691	16.5347	16.5694	16.4369	16.4106	16.46	16.2238	16.2214	16.2632
DAG	16.1428	16.1243	16.1394	15.8893	15.8672	15.7997	15.7398	15.7598	15.7556
EE	16.2362	16.2485	16.245	16.4074	16.2069	16.2355	16.1592	16.2063	16.2064
TAG	48.5161	48.9385	48.2362	47.3739	47.2611	47.0877	47.2263	47.0949	47.0425

## Sheet: Percent at each C length
Lipid classes divided into chain lengths. The percent of each chain length of the class were calculated using the pmol lipid species data.
PA
C length%	WT	WT	WT	eaf1D	eaf1D	eaf1D	WT-SorA	WT-SorA	WT-SorA
C10	0.86729	1.03036	0.823516	0.81639	1.48735	1.21149	1.22418	1.26233	1.89001
C12	1.02981	1.28617	1.19808	2.173	2.31243	1.92713	2.63726	2.59539	2.17729
C14	2.87646	3.32548	3.11503	4.98735	5.4873	4.89101	4.20435	3.7988	4.22725
C15	0.402425	0.452657	0.336196	0.716413	0.769736	0.694717	1.02723	0.915387	0.91862
C16	69.5124	70.2251	70.0736	69.6631	69.8935	69.1193	74.3586	74.9067	74.4067
C17	0.132829	0.114187	0.109965	0.198807	0.148816	0.0997204	0.211936	0.207763	0.237112
C18	25.1294	23.4811	24.3436	21.4176	19.9008	22.04	16.3115	16.3137	16.1431
C20	0.0494013	0.0525257	0	0	0	0.0165792	0.0249489	0	0
C22		0.0324771
C26				0.0272548
PC
C length%	WT	WT	WT	eaf1D	eaf1D	eaf1D	WT-SorA	WT-SorA	WT-SorA
C10	0.0269641	0.166561	0.00836497	0	0.0290456	0	0.0570933	0	0
C12	2.03955	1.9509	2.40933	2.5591	2.27948	2.73526	5.06571	4.72663	5.4097
C13	0.135966	0	0	0.135309	0.146389	0.151759	0.15845	0.0228299	0.236805
C14	1.79472	1.69737	1.80606	2.83152	2.44699	3.66975	5.78881	4.30201	4.76384
C15	5.21969	4.49748	4.76575	5.0468	5.58686	4.69346	6.34741	6.41601	6.58641
C16	76.1077	76.9695	76.3954	76.9652	77.032	76.788	70.052	73.5636	72.065
C17	0.422112	0.877045	0.626925	0.444719	0.471021	0.737513	2.90978	0.747627	0.755836
C18	14.1652	13.8412	13.888	11.9396	11.9106	11.1346	9.52145	10.1395	10.1615
C20	0.0880621	0	0.100106	0.0778065	0.0976453	0.0896406	0.099285	0.0817721	0.0209195
PE
C length%	WT	WT	WT	eaf1D	eaf1D	eaf1D	WT-SorA	WT-SorA	WT-SorA
C10	0	1.08249	0	0	0	0	0	0.133633	0
C12	1.86504	0.734903	1.8663	2.05415	2.29655	2.03467	2.91703	3.07145	3.07462
C13			0.0289728
C14	3.16575	2.01107	3.05903	4.0699	4.22678	4.15958	4.35464	4.55936	4.72033
C15	0.498904	0.588563	0.542657	0.708559	0.77704	0.624996	0.793978	0.810015	0.855746
C16	62.4038	62.2186	61.4917	61.7743	58.6444	62.9125	69.4735	69.7363	69.3914
C17	0.833029	1.34472	1.295	2.01463	2.4818	1.44691	0.900158	0.792367	0.754095
C18	30.8703	32.0196	31.2449	28.7723	31.4153	28.8214	21.414	20.7651	21.2038
C19	0	0	0	0	0.158057	0	0	0	0
C20	0.363225	0	0.471375	0.606164	0	0	0.146784	0.131837	0
PI
C length%	WT	WT	WT	eaf1D	eaf1D	eaf1D	WT-SorA	WT-SorA	WT-SorA
C10	4.87805	5.5927	5.20062	5.79132	5.29559	5.13925	10.19	9.79118	1.55459
C11	0.0759383	0.03752	0.0463249	0.0786641	0.0647547	0.0442447	0.0285087	0.0681105	0.0322436
C12	5.32176	5.56884	5.28876	6.94631	6.95373	6.98848	9.90294	9.62348	19.0513
C13	0.0186185	0.0280823	0.0249887	0	0.0380296	0.0340254	0.058869	0.0420625	0.043137
C14	4.12393	4.33333	3.94583	7.07114	7.24706	7.39838	5.34609	5.14247	13.897
C15	0.326576	0.327874	0.325493	0.768157	0.700277	0.553954	0.862107	0.781315	0.921452
C16	61.6728	61.9511	61.3916	60.4035	60.7675	60.935	58.7382	59.1175	49.7384
C17	0.174136	0.177741	0.190939	0.2607	0.26338	0.180275	0.396786	0.360437	0.305767
C18	23.3703	21.9435	23.567	18.5489	18.6447	18.6891	14.4402	15.0429	14.4346
C19	0	0.00926373	0	0	0	0	0	0	0
C20	0.0378958	0.0300097	0.018375	0.13123	0.0249753	0.0373219	0.0362765	0.0305037	0.0214094
PS
C length%	WT	WT	WT	eaf1D	eaf1D	eaf1D	WT-SorA	WT-SorA	WT-SorA
C10	0	0	0	0.276806	0.35352	0	0.781613	0.889592	0
C12	0.754801	1.04076	0.789319	0.970701	1.12865	1.02875	1.90904	1.9172	2.06802
C14	2.65566	2.82097	2.49429	6.47463	3.83458	3.68037	2.81756	2.6589	2.8267
C16	63.7745	64.3224	63.9748	60.9438	66.9347	66.391	74.1359	74.1891	74.9819
C17	0.387421	0.361173	0.394107	0.483378	0.132115	0.32839	0.374109	0.225676	0
C18	32.4276	31.4547	32.3474	30.8507	27.6164	28.5715	19.9818	20.1195	20.1234
DAG
C length %	WT	WT	WT	eaf1D	eaf1D	eaf1D	WT-SorA	WT-SorA	WT-SorA
C10	1.88493	2.00451	2.02422	2.2568	2.35197	2.66125	3.25786	3.26979	3.22681
C11				0.0338114	0.020933		0.0158926		0.0117093
C12	3.4292	3.45647	3.3024	4.97109	5.1884	5.84657	6.65461	6.44336	6.49389
C13							0.0148564
C14	5.74179	5.79285	5.45579	9.41575	9.6663	10.5191	7.24848	6.80167	7.17886
C15	0.314957	0.302946	0.343835	0.869362	0.642319	0.460612	1.15314	0.996878	0.949638
C16	62.9679	63.3274	63.4938	61.2836	61.2324	60.0466	63.5816	64.3873	63.8798
C17	0.086761	0.0879982	0.0788275	0.109892	0.135244	0.0919002	0.236855	0.238156	0.256309
C18	25.5745	25.0278	25.3011	21.0597	20.7625	20.374	17.8367	17.8628	18.003
EE
FA length%	WT	WT	WT	eaf1D	eaf1D	eaf1D	WT-SorA	WT-SorA	WT-SorA
C14				1.98237	2.42404	2.76004
C16	88.1877	87.5757	87.7485	75.6637	84.8092	82.7068	92.04	89.6826	89.682
C18	11.8123	12.4243	12.2515	22.354	12.7667	14.5332	7.96	10.3174	10.318
TAG
length%	WT	WT	WT	eaf1D	eaf1D	eaf1D	WT-SorA	WT-SorA	WT-SorA
C40	0.571017	0.802418	0.630691	2.32287	2.39372	2.78853	2.74669	2.62372	2.67866
C42	6.63011	4.48976	7.55356	9.12568	9.36572	10.067	10.5082	10.6364	10.4597
C44	8.39165	7.11703	7.8192	11.0517	11.2866	12.6259	11.131	13.3194	13.8805
C46	9.10648	9.10492	9.47002	13.6133	13.8868	15.0483	12.7683	12.1938	12.7401
C47	0	0	0	1.2264	1.21832	0.880025	1.36319	0.769581	0
C48	28.1635	27.9454	29.9755	31.1947	31.1525	30.9968	31.0624	31.094	31.7656
C49	0	0	0	0.579031	0.631152	0.443692	0.690186	0.750939	0.677356
C50	29.8595	29.6997	31.3891	22.4584	23.089	20.9324	21.8741	21.9772	21.9099
C51	0	0	0	0	0	0	0	0	0
C52	11.8758	9.7364	9.77658	6.84049	6.53744	4.60035	6.2503	5.89345	5.19385
C54	2.74793	7.86597	2.38331	1.08601	0.438716	0.744634	1.60566	0.741632	0.694374
C56	1.2578	2.02006	1.002	0.501463	0	0.471912	0	0	0
C58	1.39635	1.21833	0	0	0	0.400361	0	0	0
C60	0	0	0	0	0	0	0	0	0
